# Supplementary material
Source: PubMed Central journal article supplement (PMC6767355)
Supplement: jm9b00911_si_002.pdf [file jm9b00911_si_002.pdf]

# Bicyclic Boronate VNRX-5133 Inhibits Metallo- and Serine- $\beta$ -Lactamases

## SUPPORTING INFORMATION

*Alen Krajnc<sup>a</sup>, Jürgen Brem<sup>a</sup>, Philip Hinchliffe<sup>b</sup>, Karina Calvopiña<sup>a</sup>, Tharindi D. Panduwawala<sup>a</sup>,  
Pauline A. Lang<sup>a</sup>, Jos J. A. G. Kamps<sup>a</sup>, Jonathan M. Tyrrell<sup>c</sup>, Emma Widlake<sup>c</sup>, Benjamin G.  
Saward<sup>a</sup>, Timothy R. Walsh<sup>c</sup>, James Spencer<sup>b</sup> and Christopher J. Schofield<sup>a,\*</sup>.*

<sup>a</sup>Chemistry Research Laboratory, Department of Chemistry, 12 Mansfield Road, University of Oxford,  
Oxford, OX1 3TA, United Kingdom.

<sup>b</sup>School of Cellular and Molecular Medicine, Biomedical Sciences Building, University Walk,  
University of Bristol, Bristol, BS8 1TD, United Kingdom.

<sup>c</sup>Department of Medical Microbiology & Infectious Disease, Institute of Infection & Immunity, UHW  
Main Building, Heath Park, Cardiff, CF14 4XN, United Kingdom.

## CONTENTS

|                                                                                                                            |        |
|----------------------------------------------------------------------------------------------------------------------------|--------|
| Figure S1. Comparison of the binding modes of VNRX-5133 and benzylpenicillin. ....                                         | S3     |
| Figure S2. Crystal structure views of the tricyclic forms of VNRX-5133 in complex with NDM-1. ....                         | S4     |
| Figure S3. View of the overall fold of the class D serine- $\beta$ -lactamase (SBL) OXA-10 in complex with VNRX-5133. .... | S5     |
| Figure S4. View of the overall fold of the class B metallo- $\beta$ -lactamase (MBL) NDM-1 in complex with VNRX-5133. .... | S6     |
| Figures S5-S31 Analytical data.....                                                                                        | S7-S33 |
| Figure S32. LC-MS spectrum of 13 (VNRX-5133). ....                                                                         | S34    |
| Table S1. Error analysis for the obtained inhibition values. ....                                                          | S35    |
| Figure S33. Time course evaluation of pIC <sub>50</sub> shifts of VNRX-5133 against subclass B1 MBL NDM-1. ....            | S36    |
| Table S2. Time-dependent inhibition of subclass B1 MBL NDM-1 by VNRX-5133.....                                             | S36    |
| Table S3. Processing and refinement statistics for NDM-1 / OXA-10 with VNRX-5133 .....                                     | S37    |
| Table S4. Molprobit validation report for OXA-10:VNRX-5133. ....                                                           | S38    |
| Table S5. Molprobit validation report for NDM-1:VNRX-5133.....                                                             | S38    |
| References .....                                                                                                           | S39    |

**Figure S1. Comparison of the binding modes of VNRX-5133 and benzylpenicillin.** Overlay of views from VNRX-5133 (PDB ID: 6RTN, yellow) and hydrolysed benzylpenicillin (PDB ID: 2WGI<sup>1</sup>, orange) in complex with the Class D serine- $\beta$ -lactamase OXA-10. The nucleophilic Ser67 residue is in white.

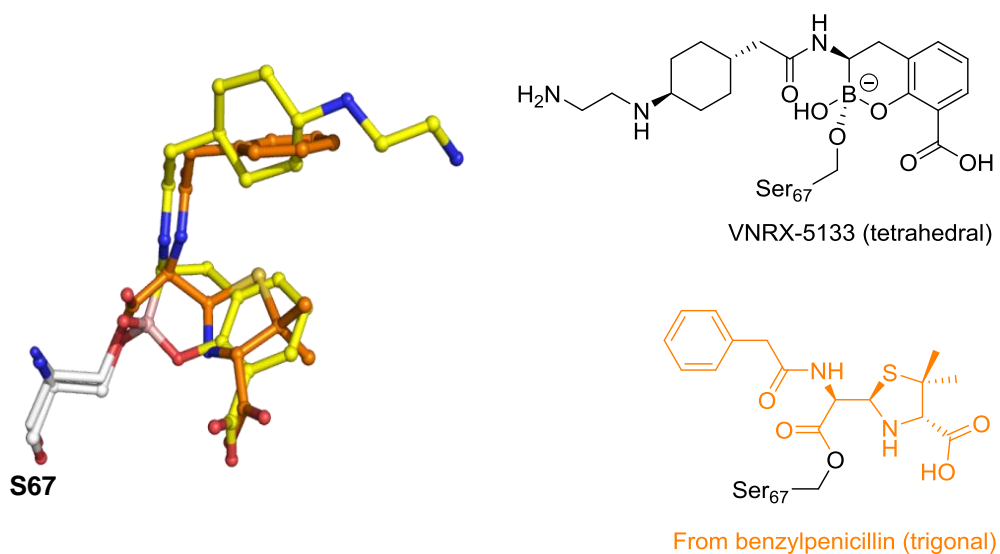

**Figure S2. Crystal structure views of the tricyclic forms of VNRX-5133 in complex with NDM-1.** 1. (A) Omit 2mFo-DFc electron densities (grey mesh) for the tricyclic inhibitor form in Chain A (white, left) and Chain B (magenta, right) contoured to  $2.8\sigma$  and  $3\sigma$ , respectively; Overlay of views of the tricyclic VNRX-5133 forms in chains A and B (in white and magenta, respectively) in the asymmetric unit of NDM-1 (PDB ID: 6RFM); (B) Comparison of the binding modes of the tricyclic forms of VNRX-5133 and hydrolysed benzylpenicillin (PDB ID: 4EYF<sup>2</sup>, green). Notably, zinc ions (spheres) are positioned similarly in both structures.

**A**

*Tricyclic inhibitor form, Chain A:*

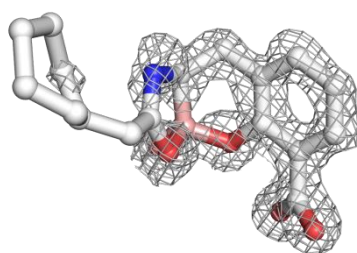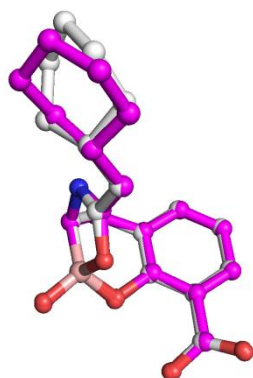

*Tricyclic inhibitor form, Chain B:*

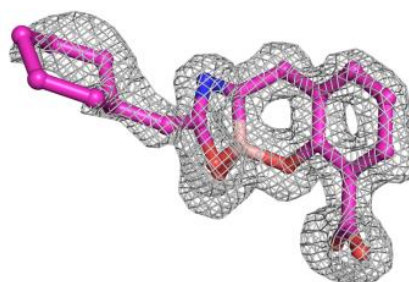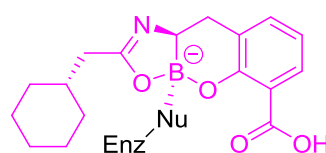

VNRX-5133  
(tricyclic  $sp^3$  form)

Enz-Nu = Enz-(Zn<sup>II</sup>)<sub>n</sub>-OH

**B**

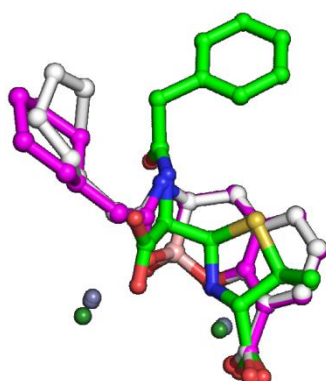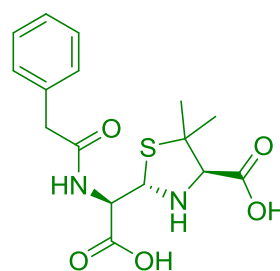

hydrolyzed benzylpenicillin

+ Enz-Nu = Enz-(Zn<sup>II</sup>)<sub>n</sub>-OH

**Figure S3. View of the overall fold of the class D serine- $\beta$ -lactamase (SBL) OXA-10 in complex with VNRX-5133.** Cartoon representation containing both molecules in the asymmetric unit (grey, chains A and B, PDB 6RTN). The ligand (VNRX-5133, yellow) bound as a bicyclic tetrahedral complex and the carbamylated Lys70 residue (KCX, orange) are shown as sticks. The  $\alpha$ -helices containing the nucleophilic serine residue are in cyan, and the conserved  $\Omega$ -loop common to Class A SBLs and penicillin-binding proteins are in red.

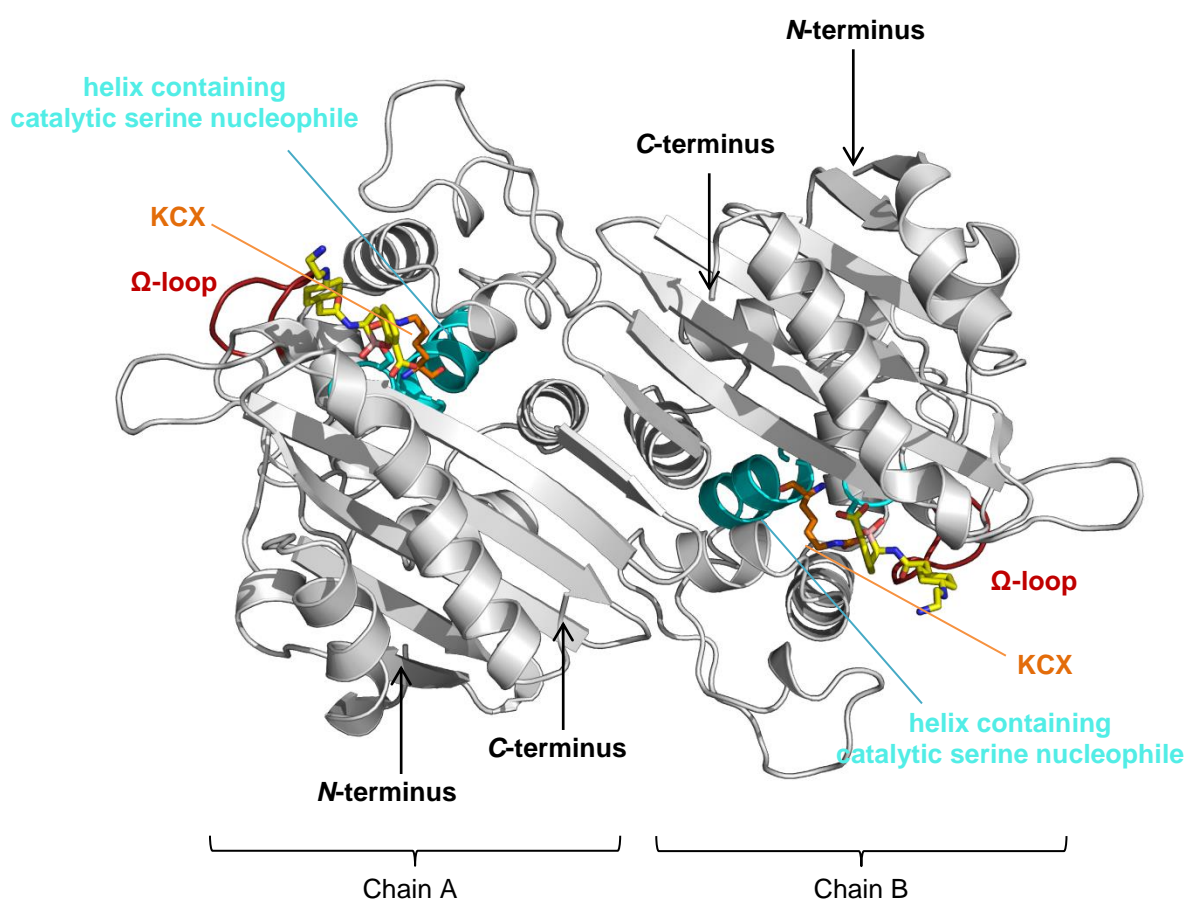

**Figure S4. View of the overall fold of the class B metallo- $\beta$ -lactamase (MBL) NDM-1 in complex with VNRX-5133.** Cartoon representation showing both protein molecules in the asymmetric unit (grey, chains A and B, PDB ID: 6RFM). The ligand (VNRX-5133) observed in either bicyclic (yellow) or tricyclic (magenta) tetrahedral forms is shown in ball and stick representation. Zinc ions are shown as purple spheres. The two keys active site loops likely closely involved in the substrate binding and subsequent catalysis are shown: disordered L3 loop areas are marked with red squares; L10 loop is in green.

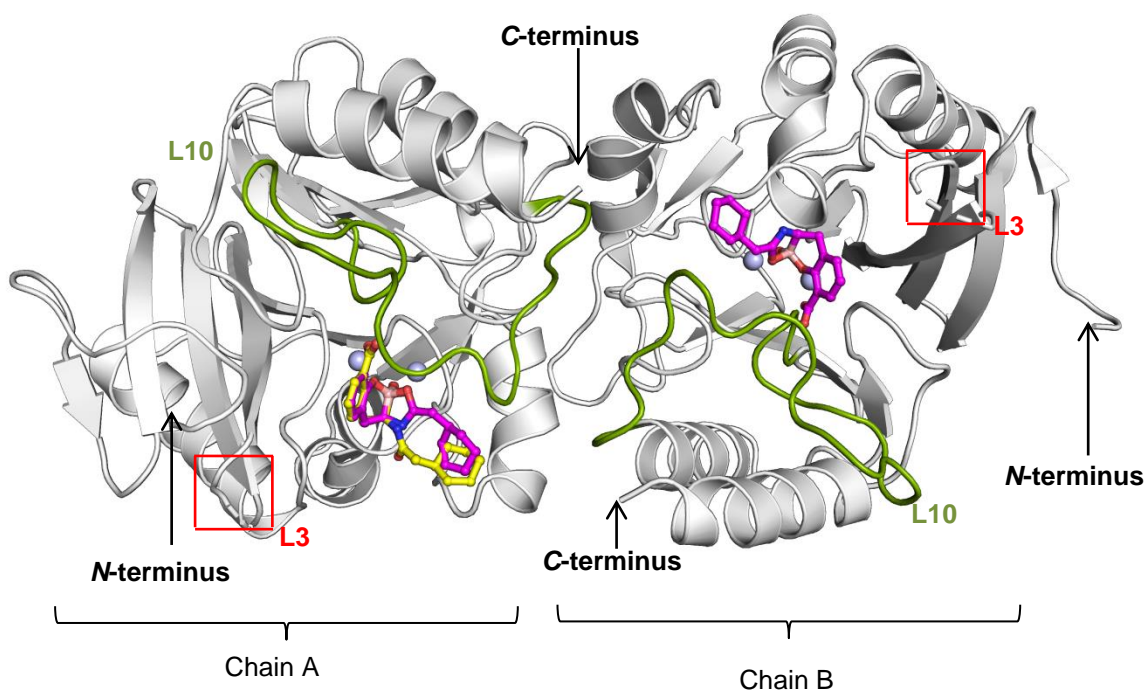

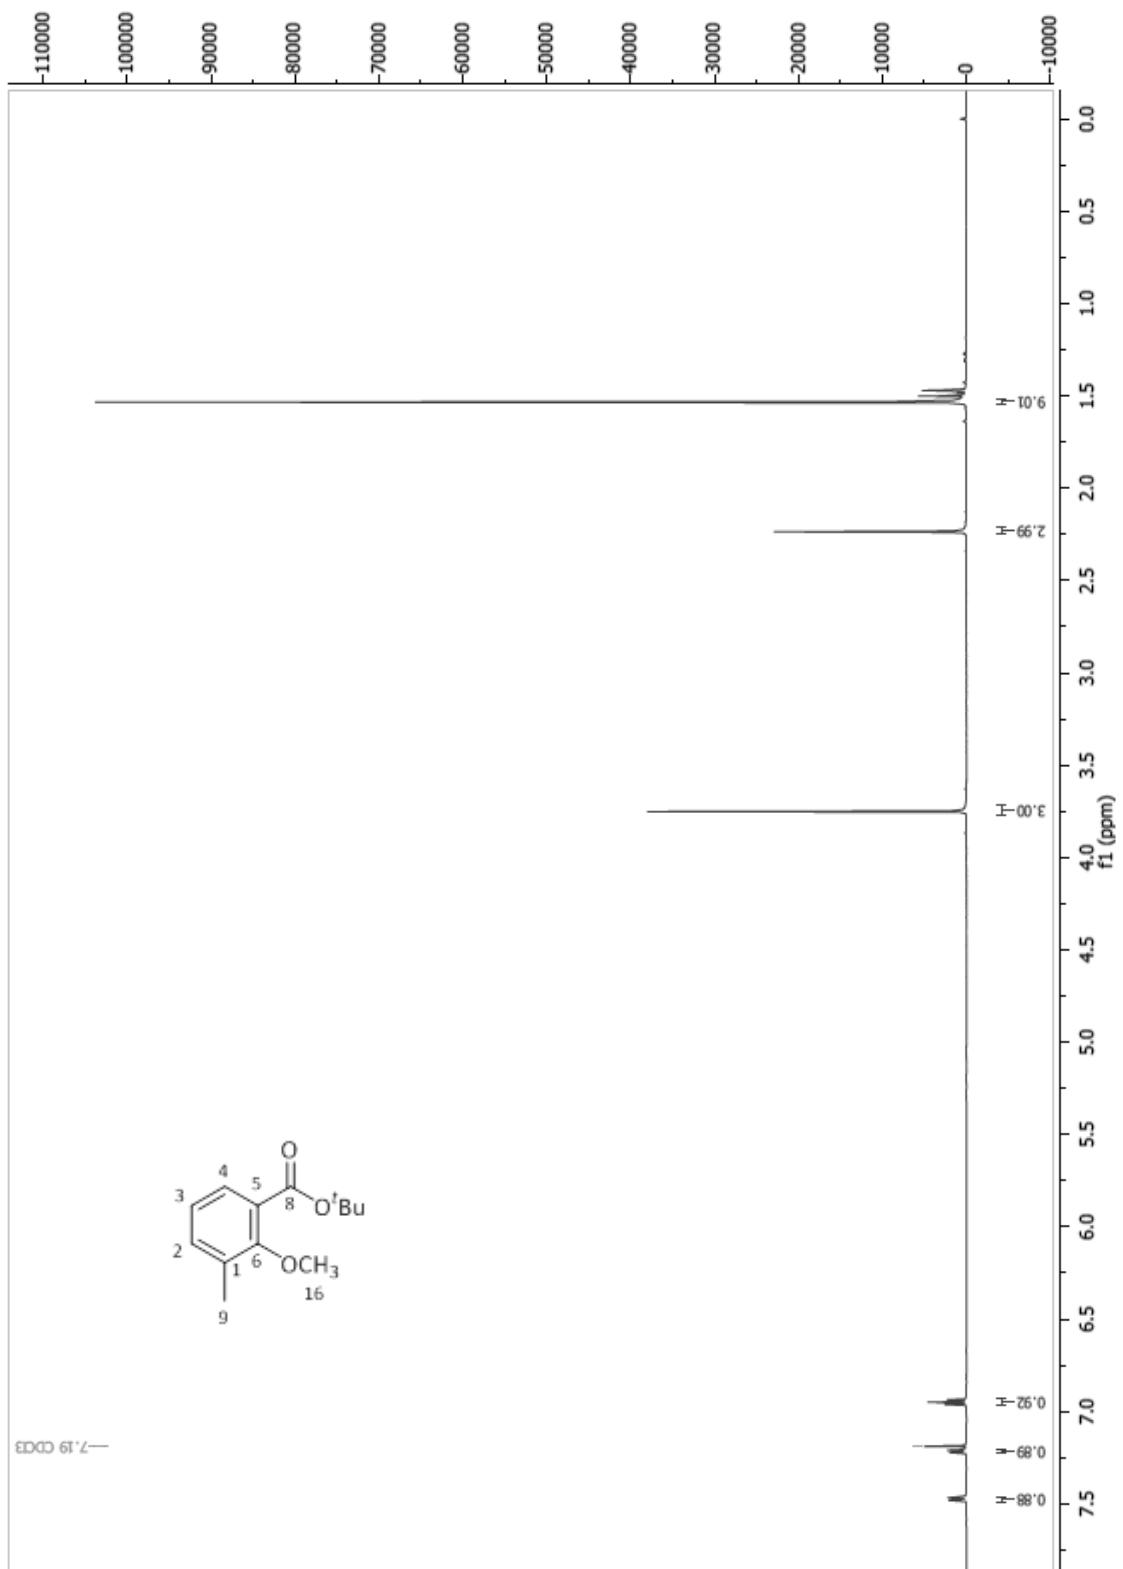

Figure S5. <sup>1</sup>H NMR spectrum of 2.

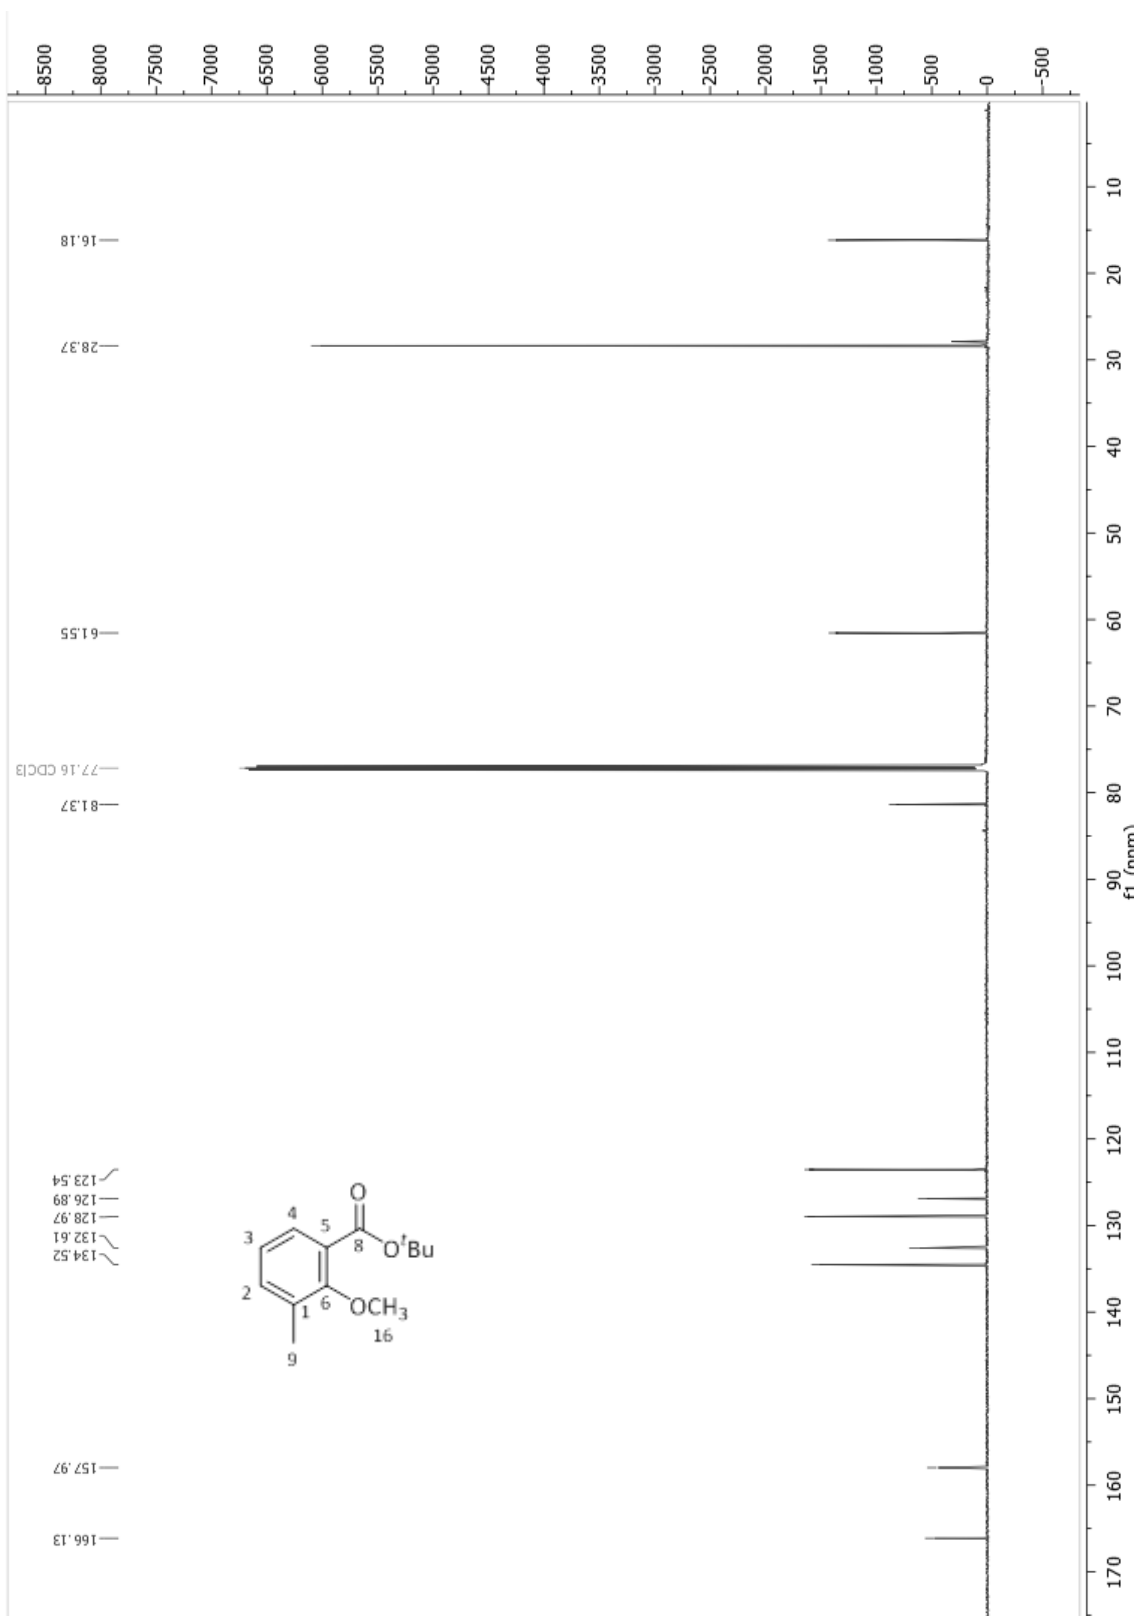

Figure S6. <sup>13</sup>C NMR spectrum of 2.



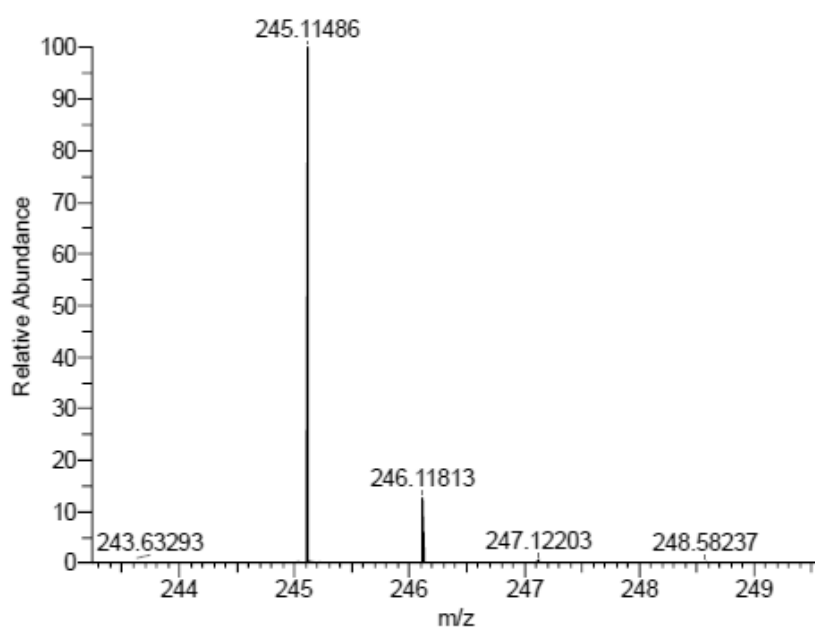

Measured  
Spectrum

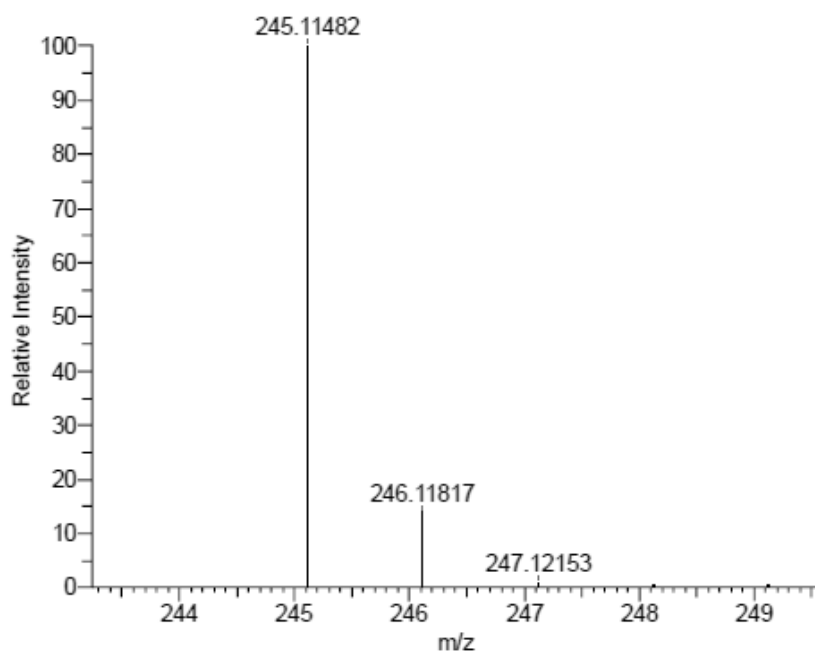

Calculated  
Spectrum

| m/z       | Formula                                                         | RDB | Delta ppm | Theo. Mass |
|-----------|-----------------------------------------------------------------|-----|-----------|------------|
| 245.11487 | C <sub>13</sub> H <sub>18</sub> O <sub>3</sub> <sup>23</sup> Na | 4.5 | 0.21      | 245.11482  |

Figure S7. HRMS spectrum of 2.

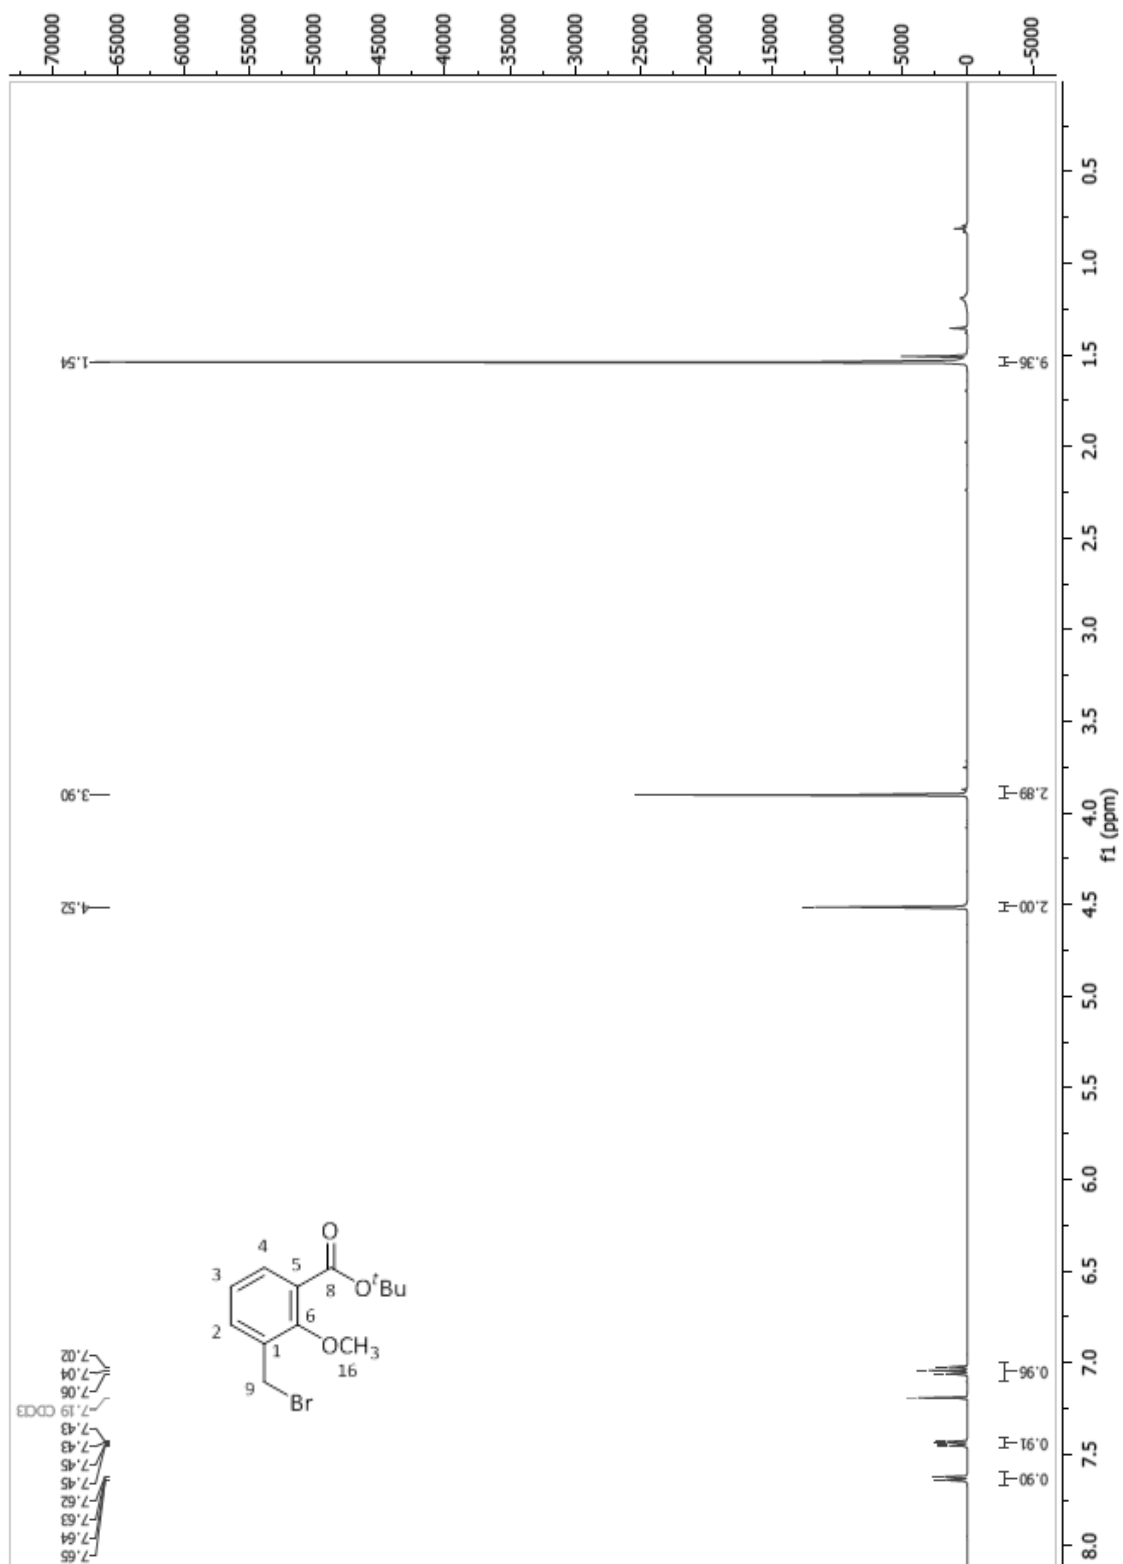

Figure S8. <sup>1</sup>H NMR spectrum of 3.

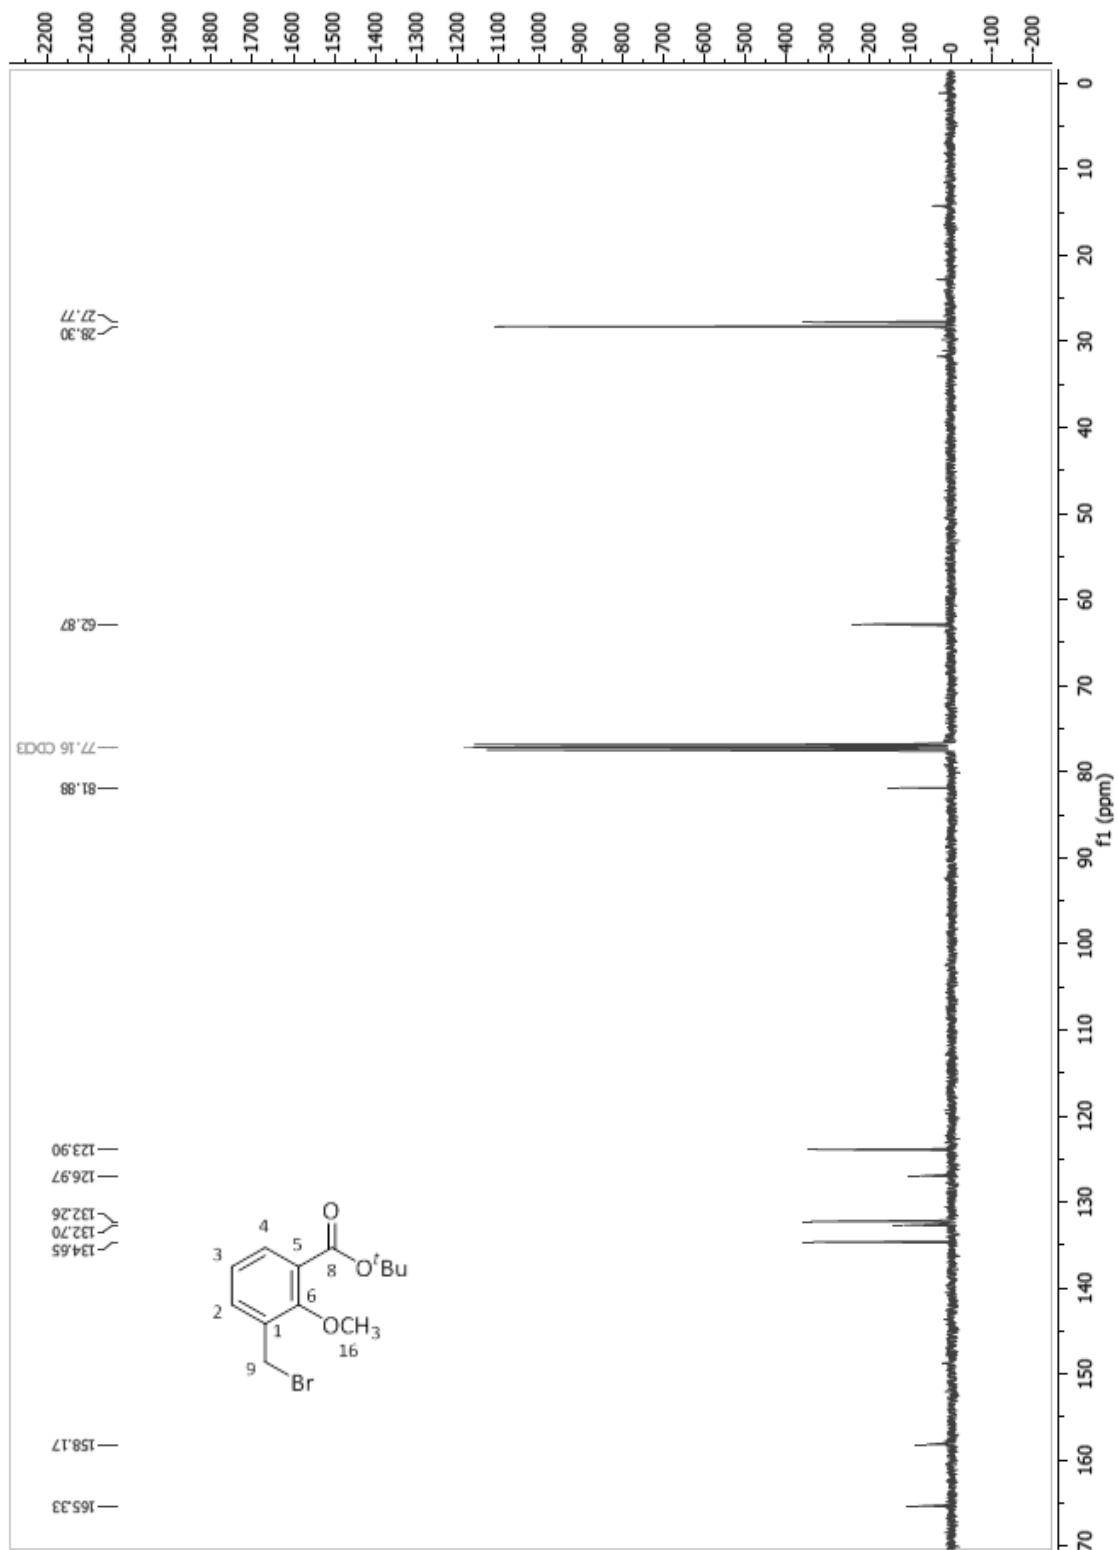

Figure S9. <sup>13</sup>C NMR spectrum of 3.

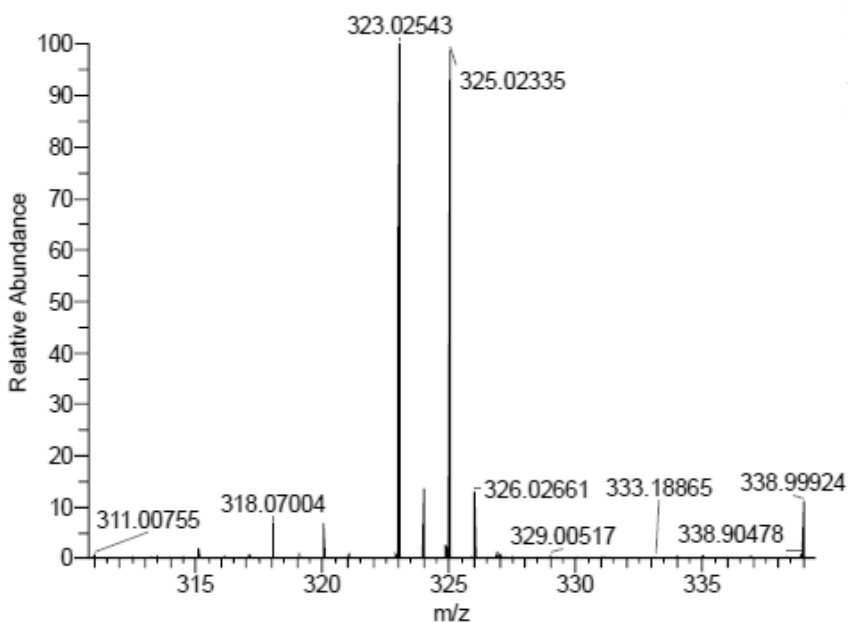

NL: 1.10E7  
 ESI75369 #13-27 RT: 0.15-0.31 AV: 8 NL:  
 1.77E+007  
 T: FTMS (1,1) + p ESI Full lock ms  
 [80.00-1600.00]

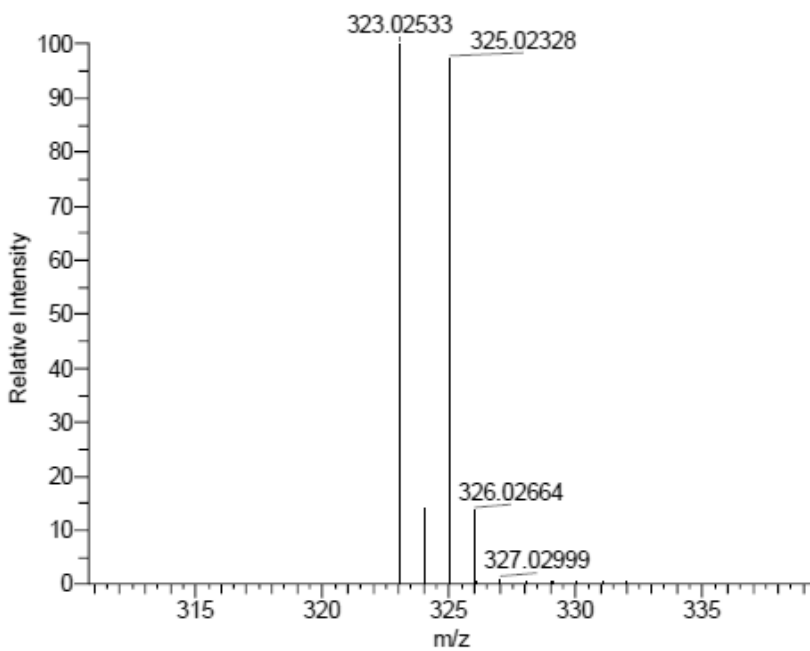

NL: 4.37E5  
 C13H17O3Br1Na1: C<sub>13</sub> H<sub>17</sub> O<sub>3</sub> Br Na Chrg  
 1 R: 1000000 Res. Pwr. @FWHM

| m/z       | Formula                                                                          | RDB | Delta ppm | Theo. Mass |
|-----------|----------------------------------------------------------------------------------|-----|-----------|------------|
| 323.02542 | C <sub>13</sub> H <sub>17</sub> O <sub>3</sub> <sup>79</sup> Br <sup>23</sup> Na | 4.5 | 0.29      | 323.02533  |

Figure S10. HRMS spectrum of 3.

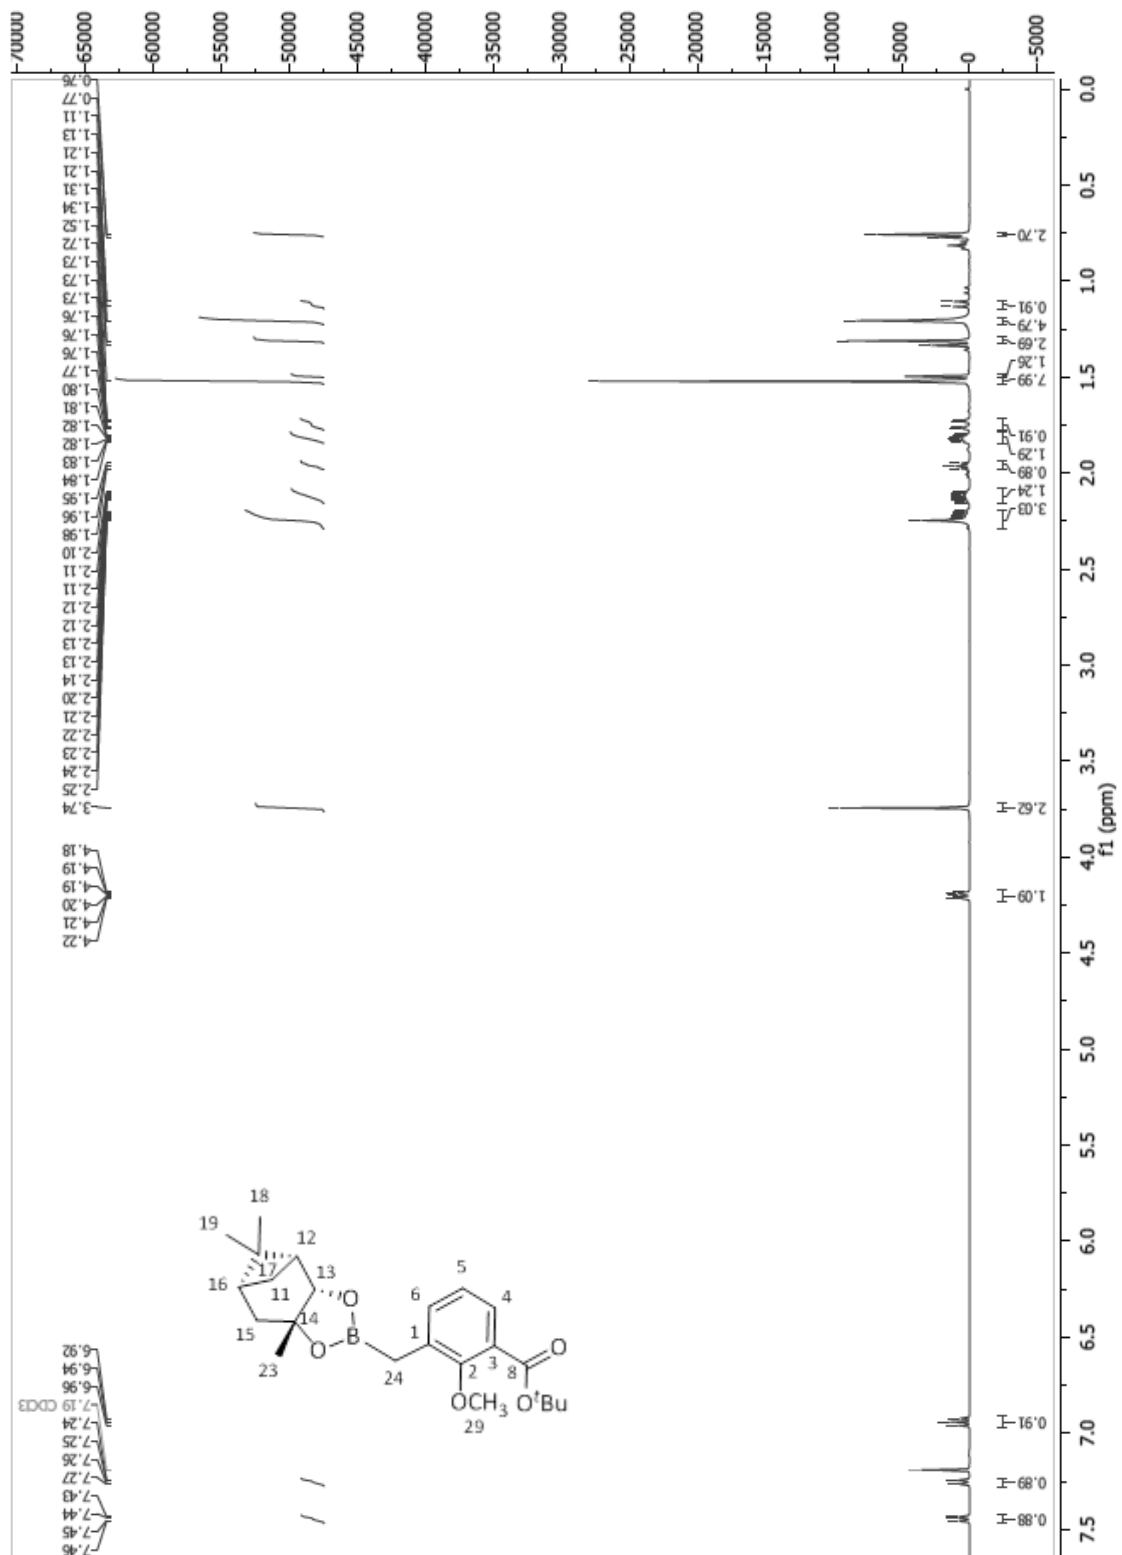

Figure S11. <sup>1</sup>H NMR spectrum of 4.

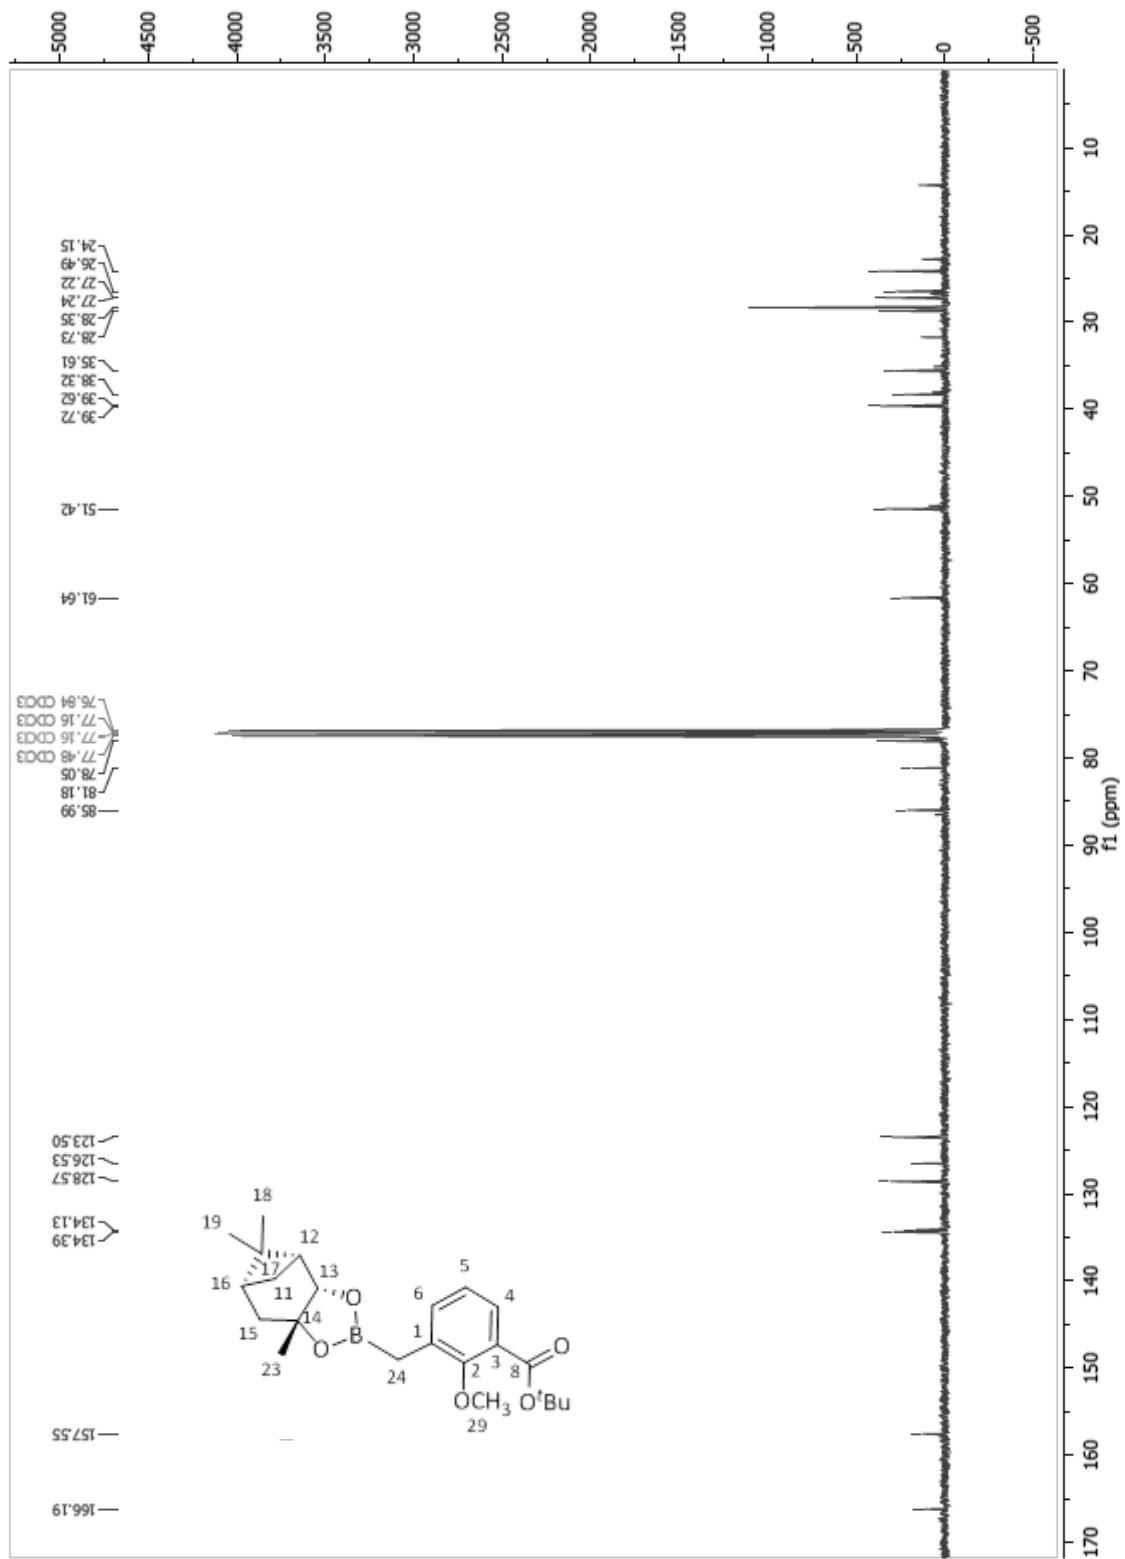

Figure S12.  $^{13}\text{C}$  NMR spectrum of 4.

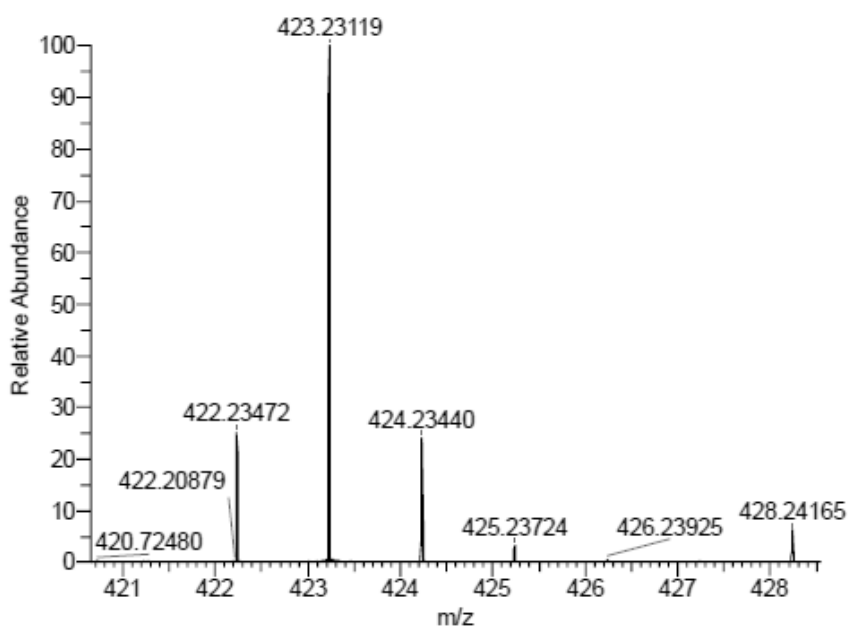

Measured  
Spectrum

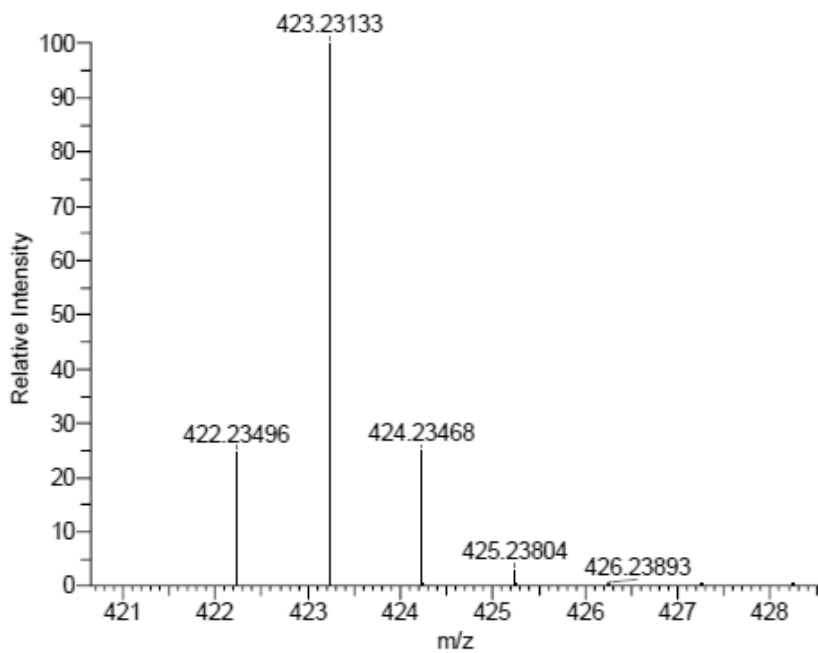

Calculated  
Spectrum

| m/z       | Formula                                                                         | RDB | Delta ppm | Theo. Mass |
|-----------|---------------------------------------------------------------------------------|-----|-----------|------------|
| 422.23471 | C <sub>23</sub> H <sub>33</sub> O <sub>5</sub> <sup>10</sup> B <sup>23</sup> Na | 7   | -0.58     | 422.23496  |

Figure S13. HRMS spectrum of 4.

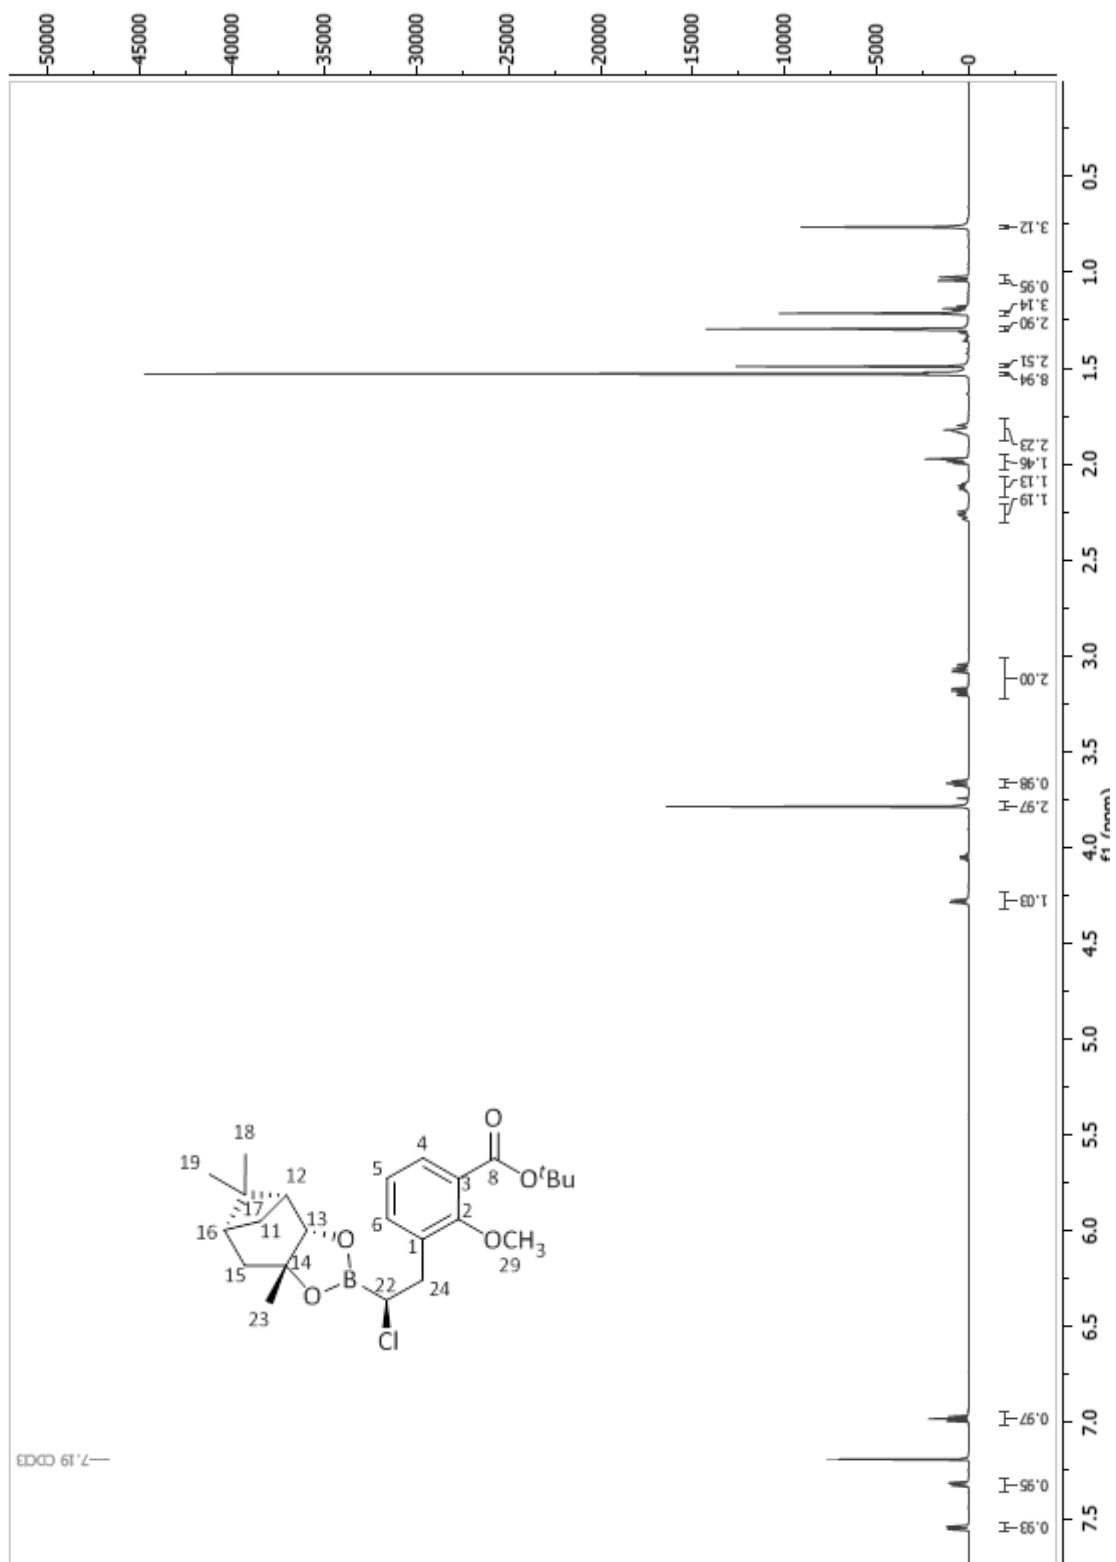

Figure S14.  $^1\text{H}$  NMR spectrum of 5.



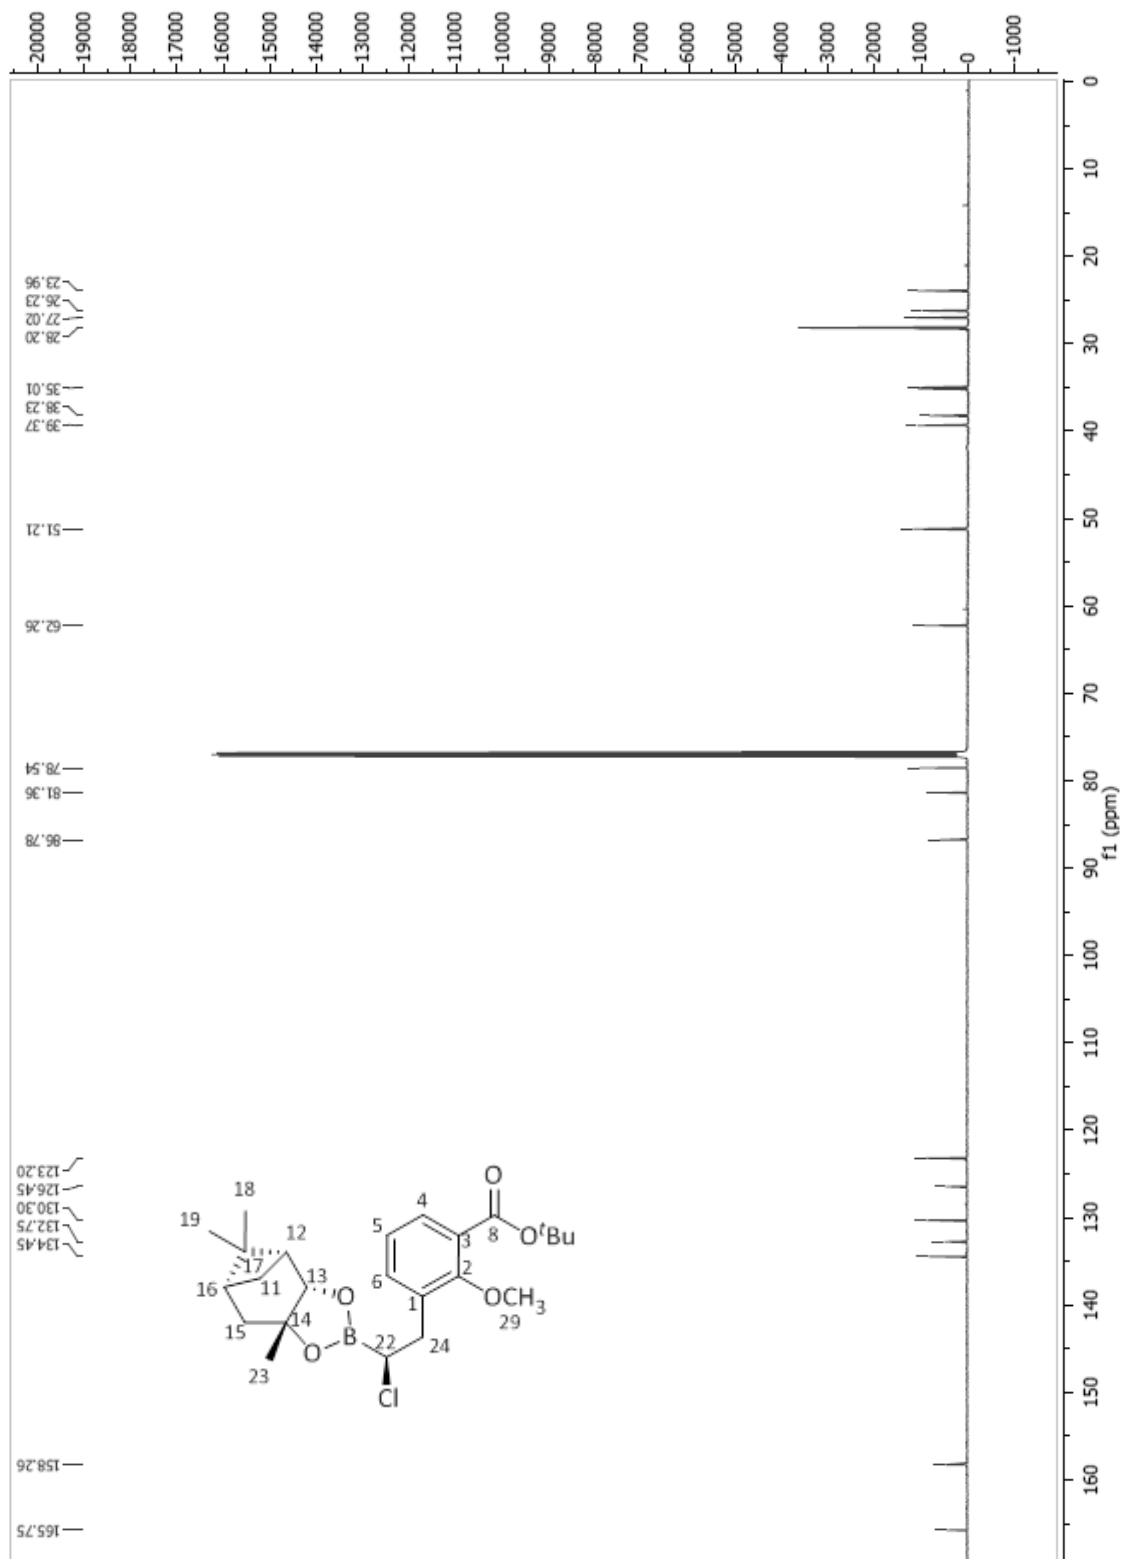

Figure S15.  $^{13}\text{C}$  NMR spectrum of 5.

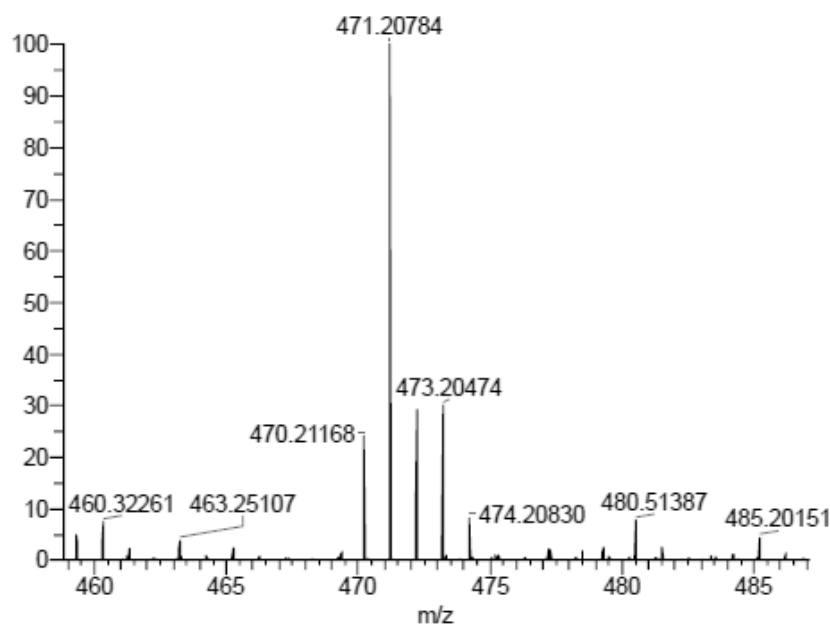

NL: 9.87E5  
 ESI70527 #11-27 RT: 0.12-0.32 AV: 9 NL:  
 4.11E6  
 T: FTMS (1,1) + p ESI Full lock ms  
 [80.00-1600.00]

Measured  
 Spectrum

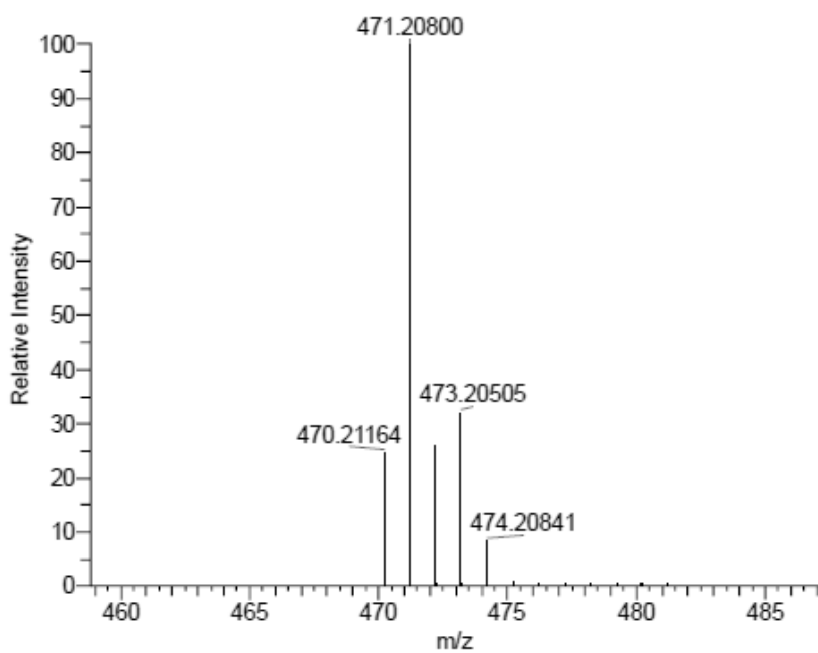

NL: 4.81E5  
 C24H34O5B1Cl1Na1: C<sub>24</sub>H<sub>34</sub>O<sub>5</sub>B Cl Na  
 Chrg 1 R: 1000000 Res. Pwr. @FWHM

Calculated  
 Spectrum

| m/z       | Formula                                                                                          | RDB | Delta ppm | Theo. Mass |
|-----------|--------------------------------------------------------------------------------------------------|-----|-----------|------------|
| 470.21167 | C <sub>24</sub> H <sub>34</sub> O <sub>5</sub> <sup>10</sup> B <sup>10</sup> Cl <sup>35</sup> Na | 7   | 0.07      | 470.21164  |

Figure S16. HRMS spectrum of 5.

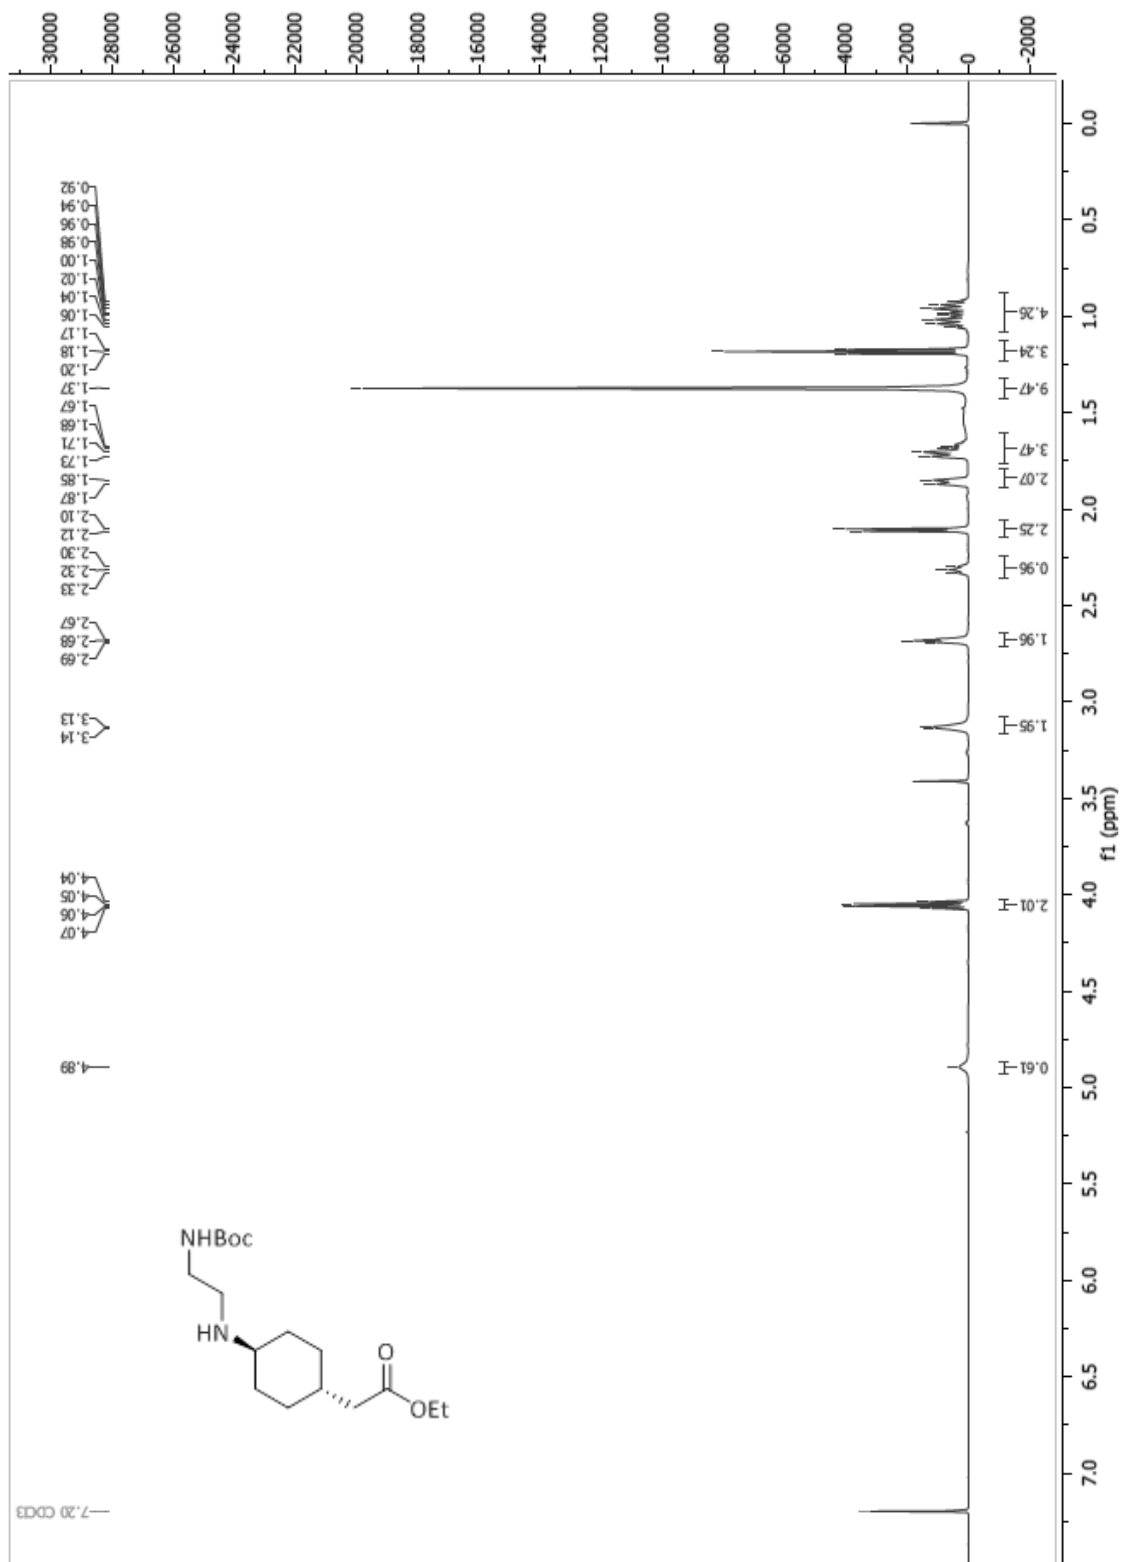

Figure S17. <sup>1</sup>H NMR spectrum of 9.

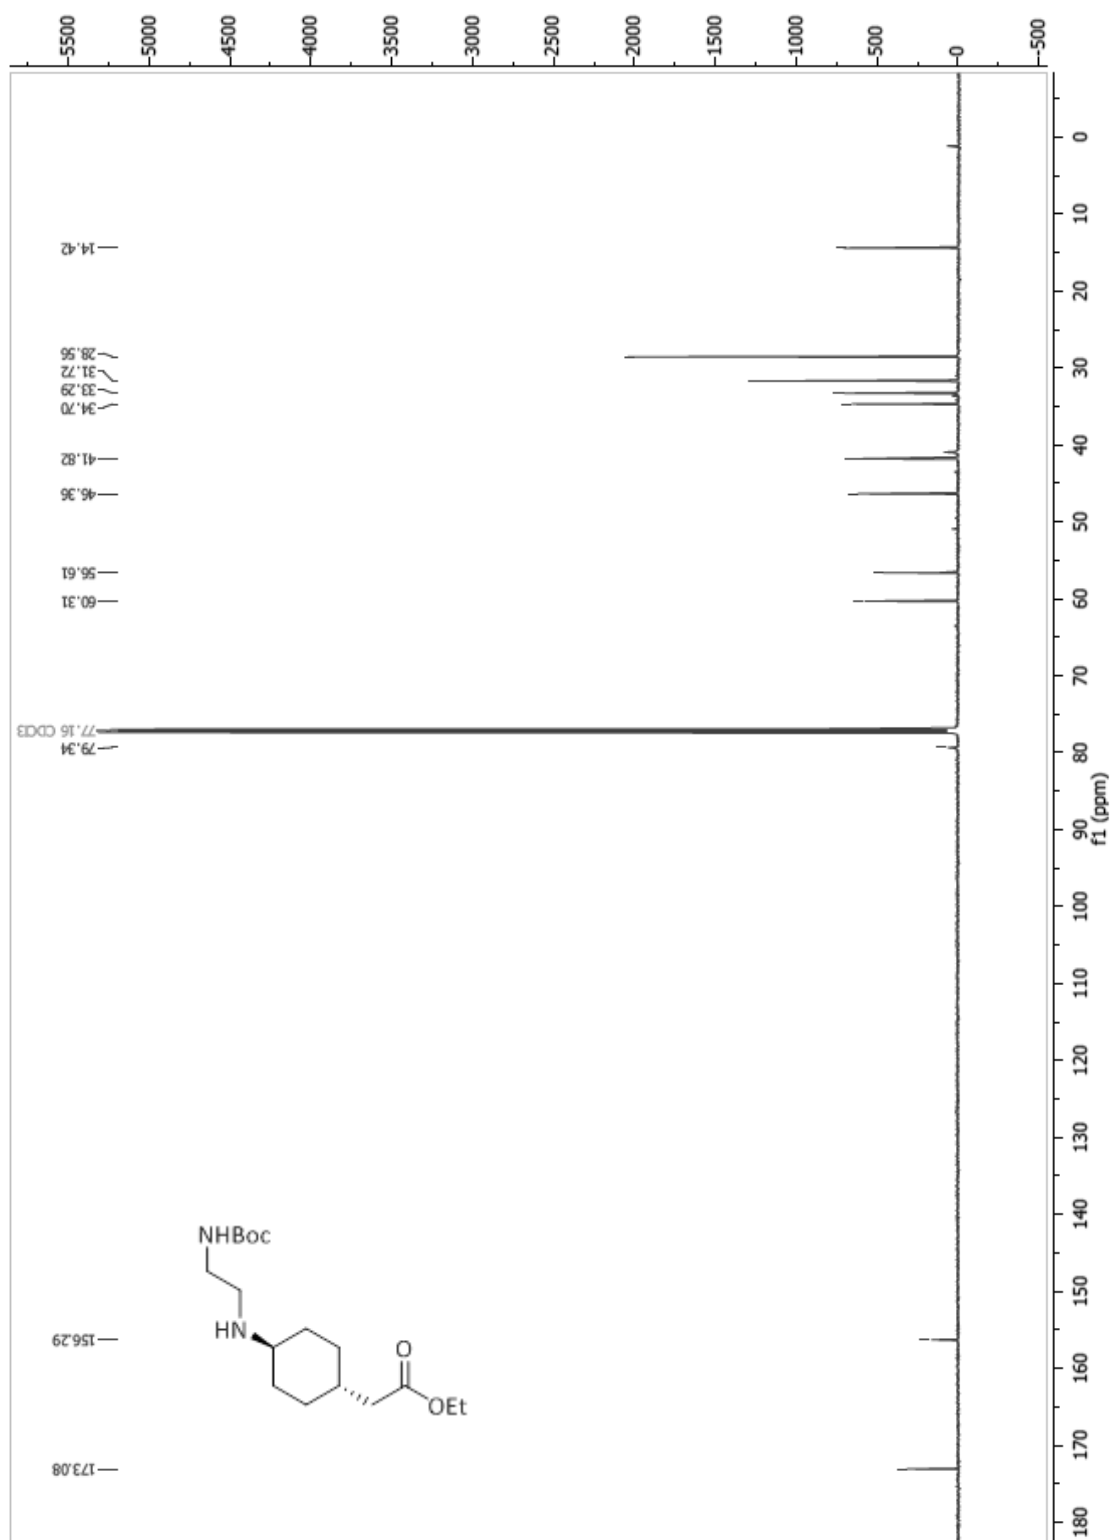

Figure S18. <sup>13</sup>C NMR spectrum of 9.

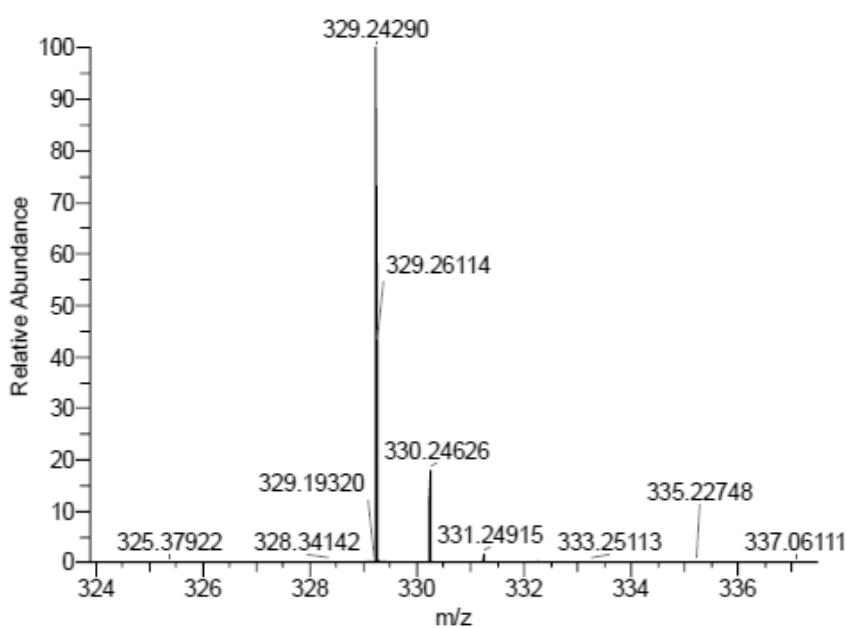

Measured  
Spectrum

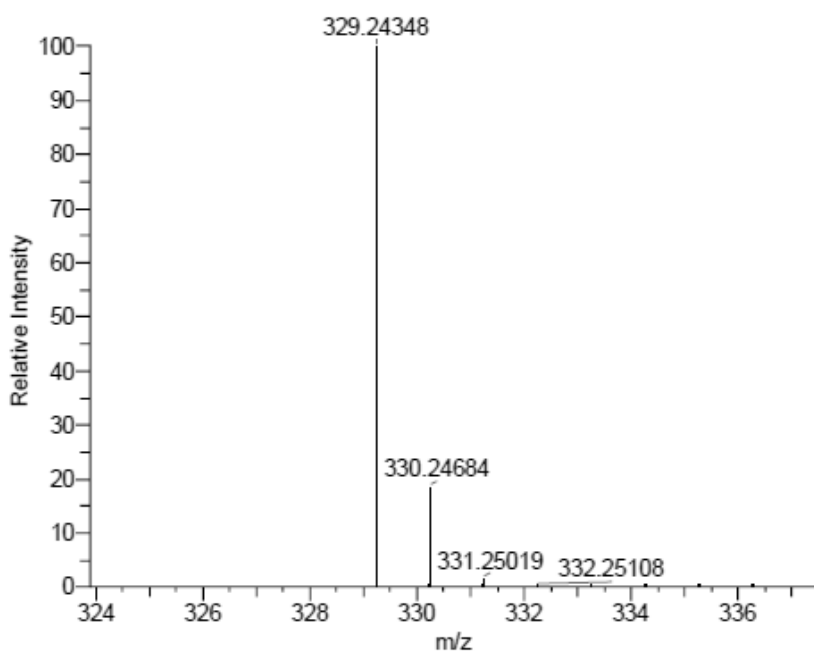

Calculated  
Spectrum

| m/z       | Formula                                                       | RDB | Delta ppm | Theo. Mass |
|-----------|---------------------------------------------------------------|-----|-----------|------------|
| 329.24289 | C <sub>17</sub> H <sub>33</sub> O <sub>4</sub> N <sub>2</sub> | 2.5 | -1.81     | 329.24348  |

Figure S19. HRMS spectrum of 9.

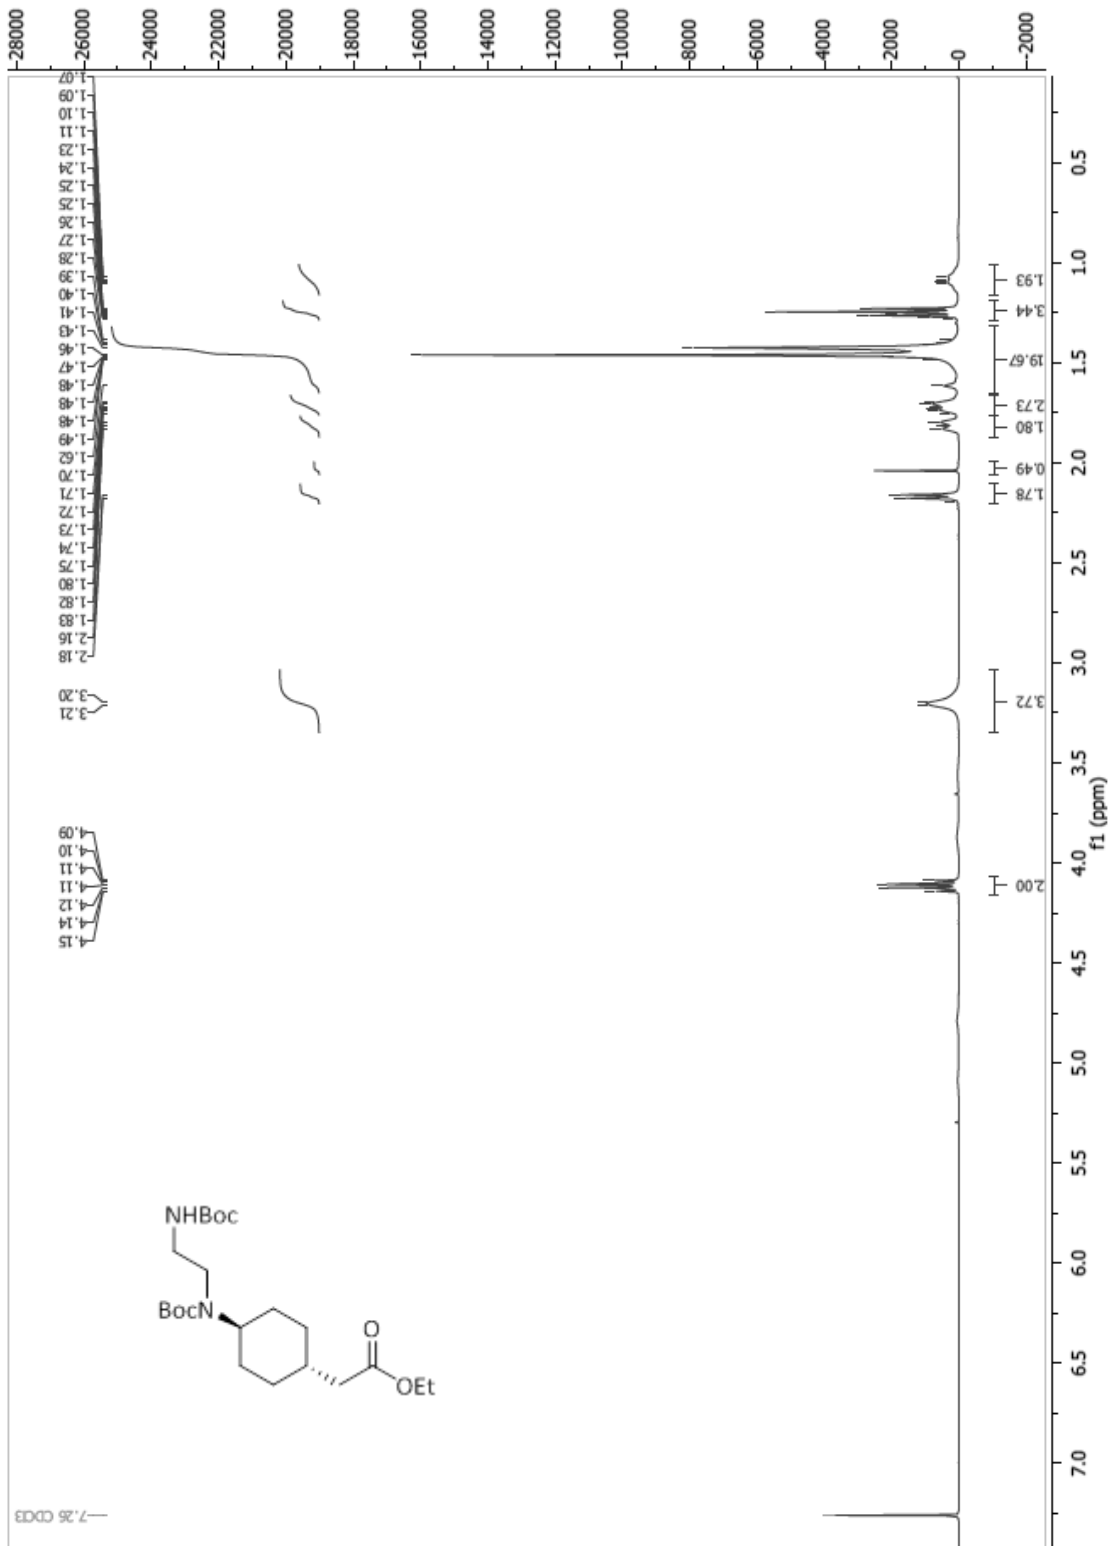

Figure S20. <sup>1</sup>H NMR spectrum of 10.

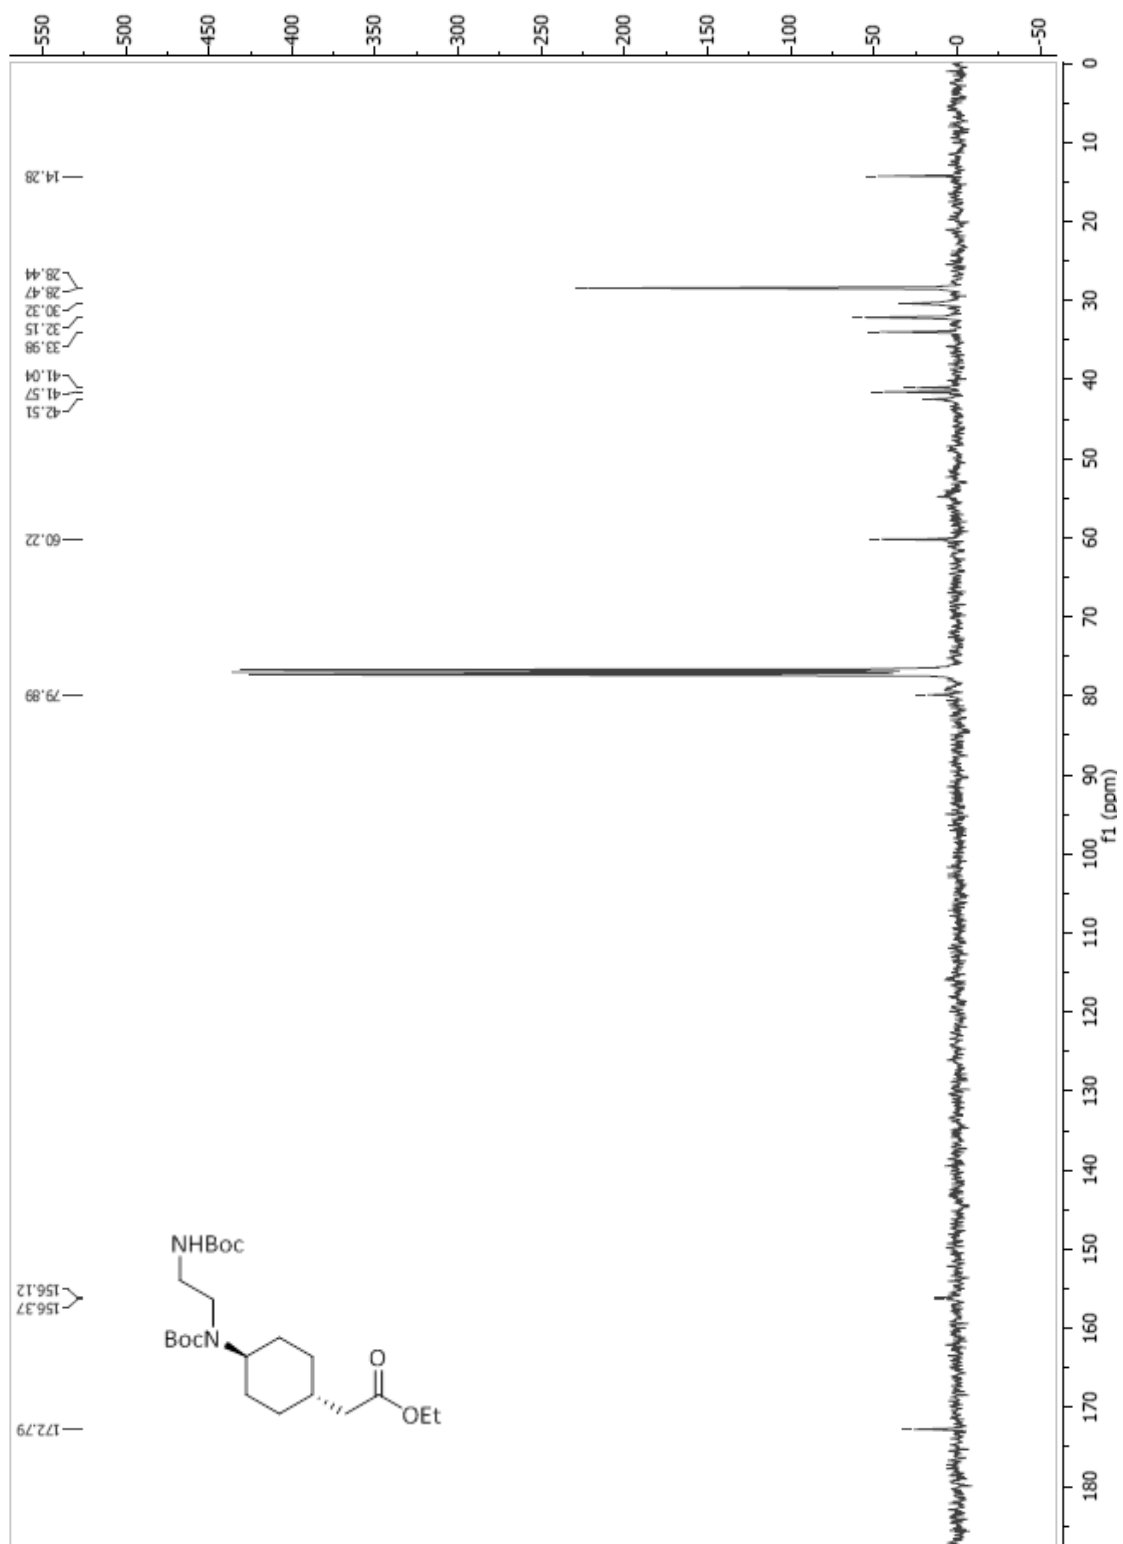

Figure S21.  $^{13}\text{C}$  NMR spectrum of 10.

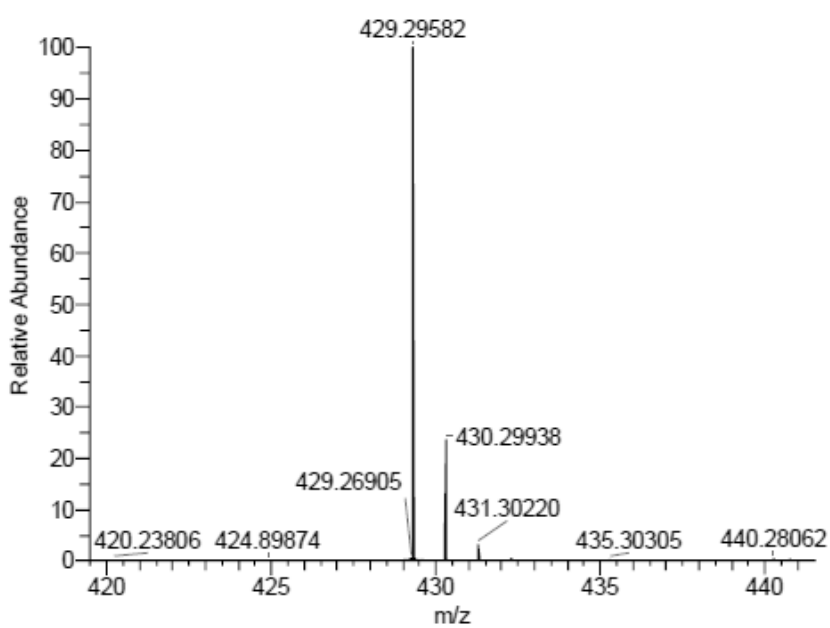

NL: 4.92E7  
 ESI75211 #13-27 RT: 0.15-0.31 AV: 8 NL:  
 4.92E+007  
 T: FTMS {1,1} + p ESI Full ms  
 [80.00-1600.00]

Measured  
 Spectrum

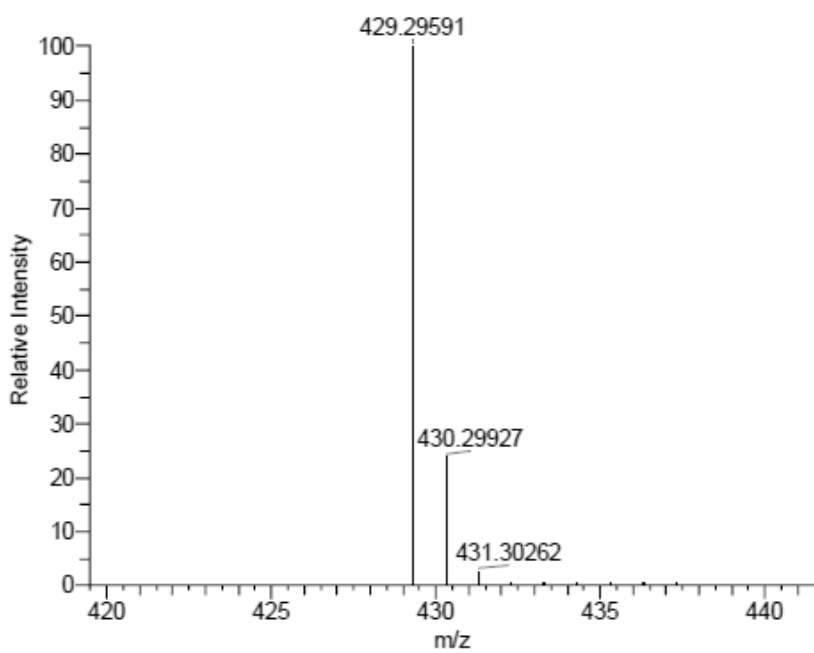

NL: 7.68E5  
 C22H41O6N2 Chrg 1 R:  
 1000000 Res. Pwr. @FWHM

Calculated  
 Spectrum

| m/z       | Formula                                                       | RDB | Delta ppm | Theo. Mass |
|-----------|---------------------------------------------------------------|-----|-----------|------------|
| 429.29582 | C <sub>22</sub> H <sub>41</sub> O <sub>6</sub> N <sub>2</sub> | 3.5 | -0.21     | 429.29591  |

Figure S22. HRMS spectrum of 10.



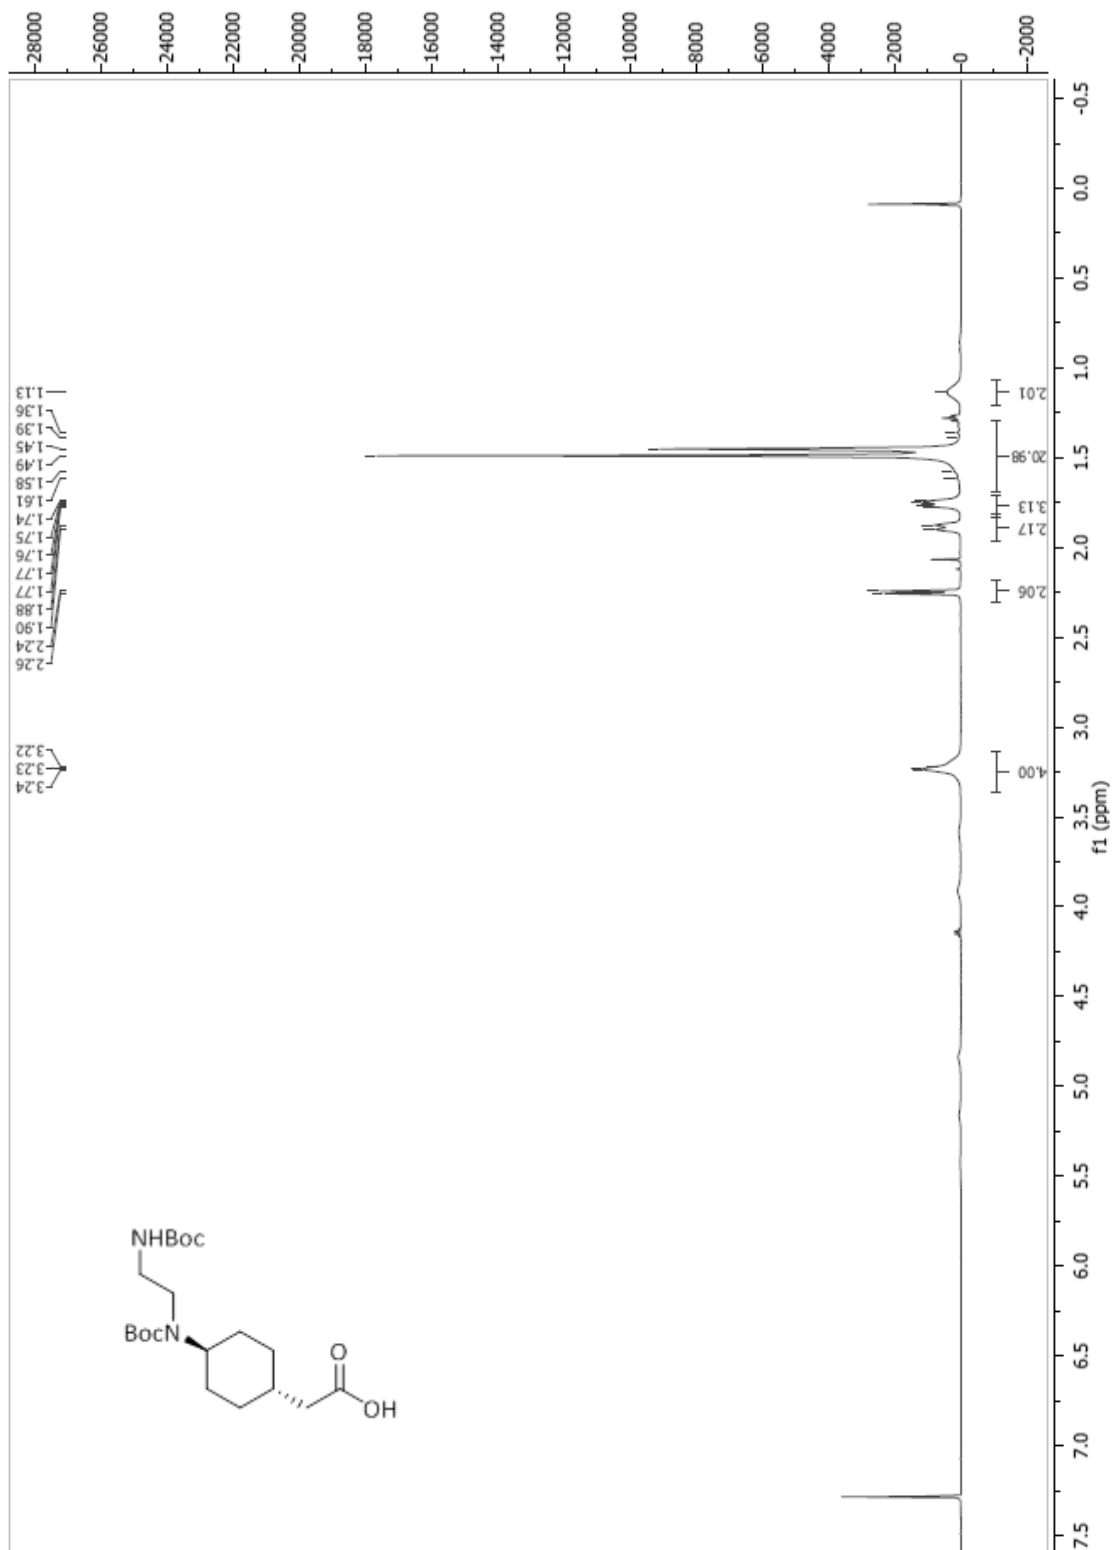

Figure S23. <sup>1</sup>H NMR spectrum of 11.

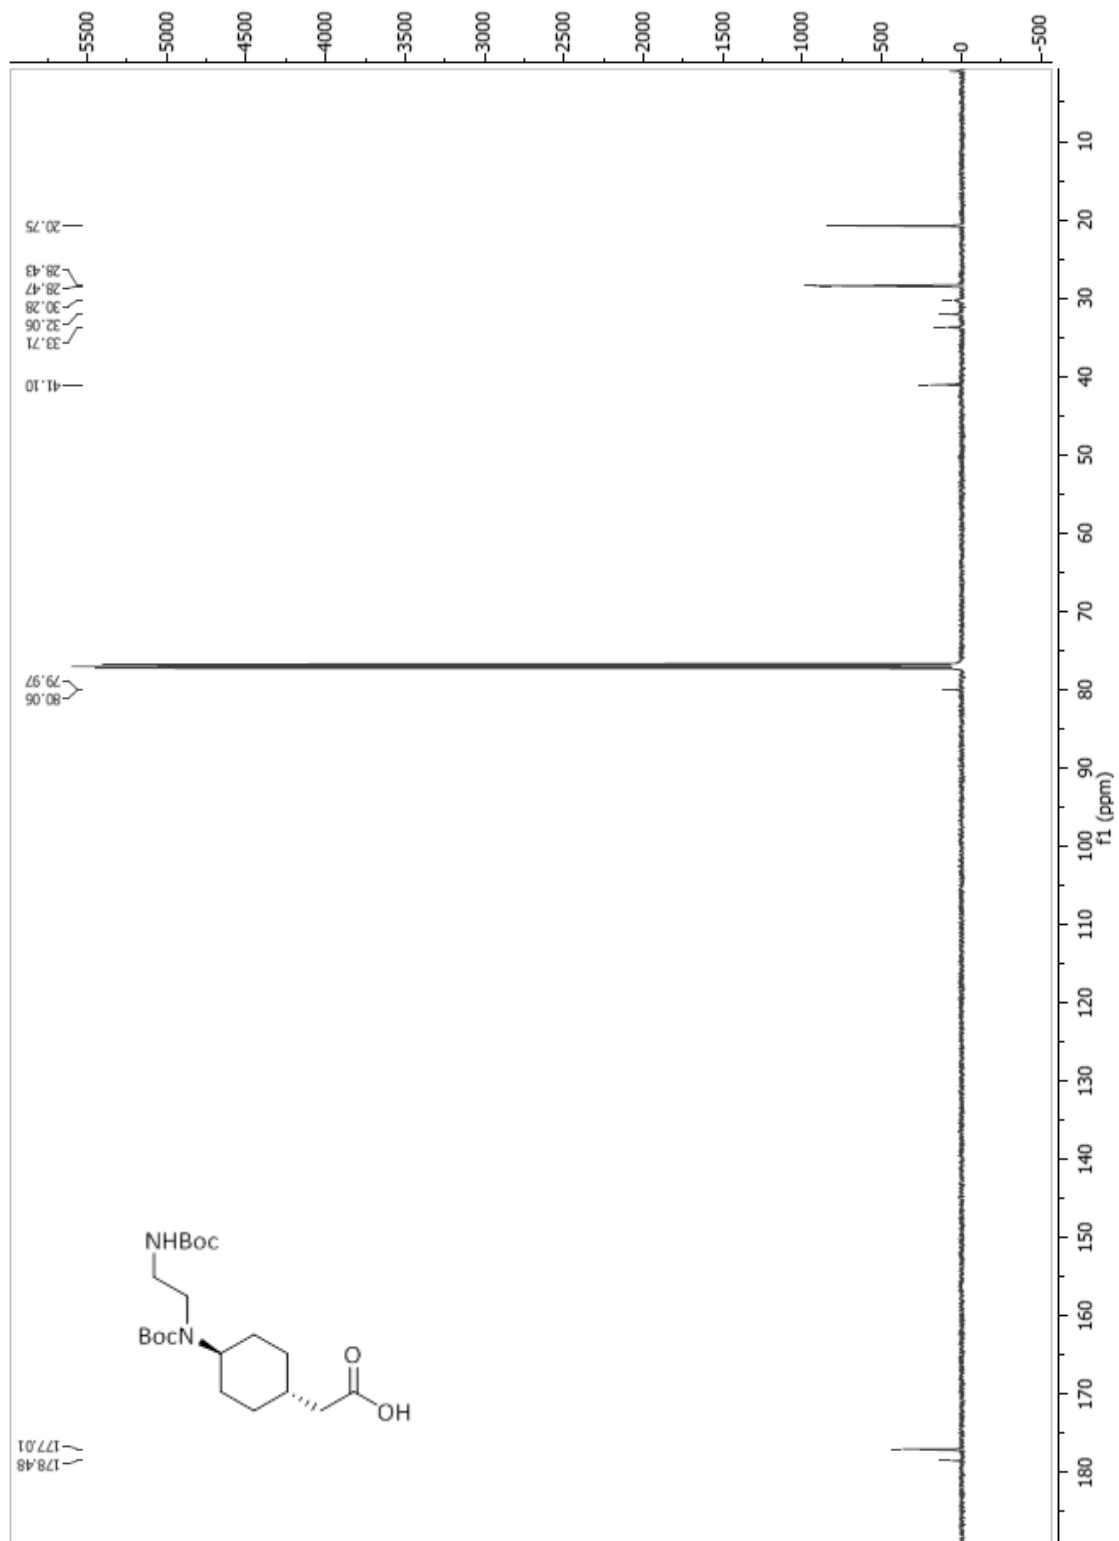

Figure S24. <sup>13</sup>C NMR spectrum of 11.

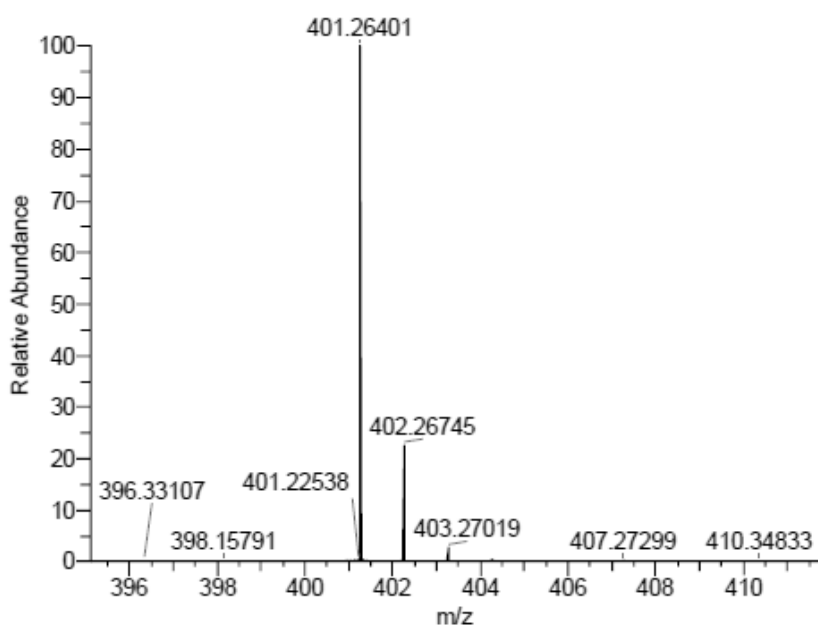

NL: 5.82E7  
 ESI75368 #13-28 RT: 0.15-0.3 AV: 8 NL:  
 5.82E+007  
 T: FTMS {1,1} + p ESI Full ms  
 [80.00-1600.00]

Measured  
 Spectrum

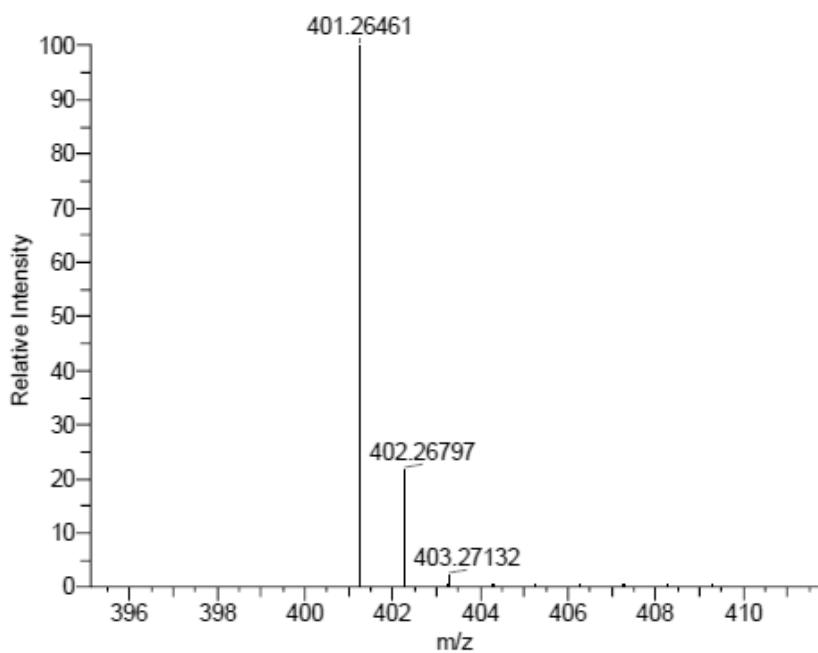

NL: 7.86E5  
 C20H37O6N2: C<sub>20</sub>H<sub>37</sub>O<sub>6</sub>N<sub>2</sub> Chrg 1 R:  
 1000000 Res. Pwr. @FWHM

Calculated  
 Spectrum

| m/z       | Formula                                                       | RDB | Delta ppm | Theo. Mass |
|-----------|---------------------------------------------------------------|-----|-----------|------------|
| 401.26401 | C <sub>20</sub> H <sub>37</sub> O <sub>6</sub> N <sub>2</sub> | 3.5 | -1.51     | 401.26461  |

Figure S25. HRMS spectrum of 11.

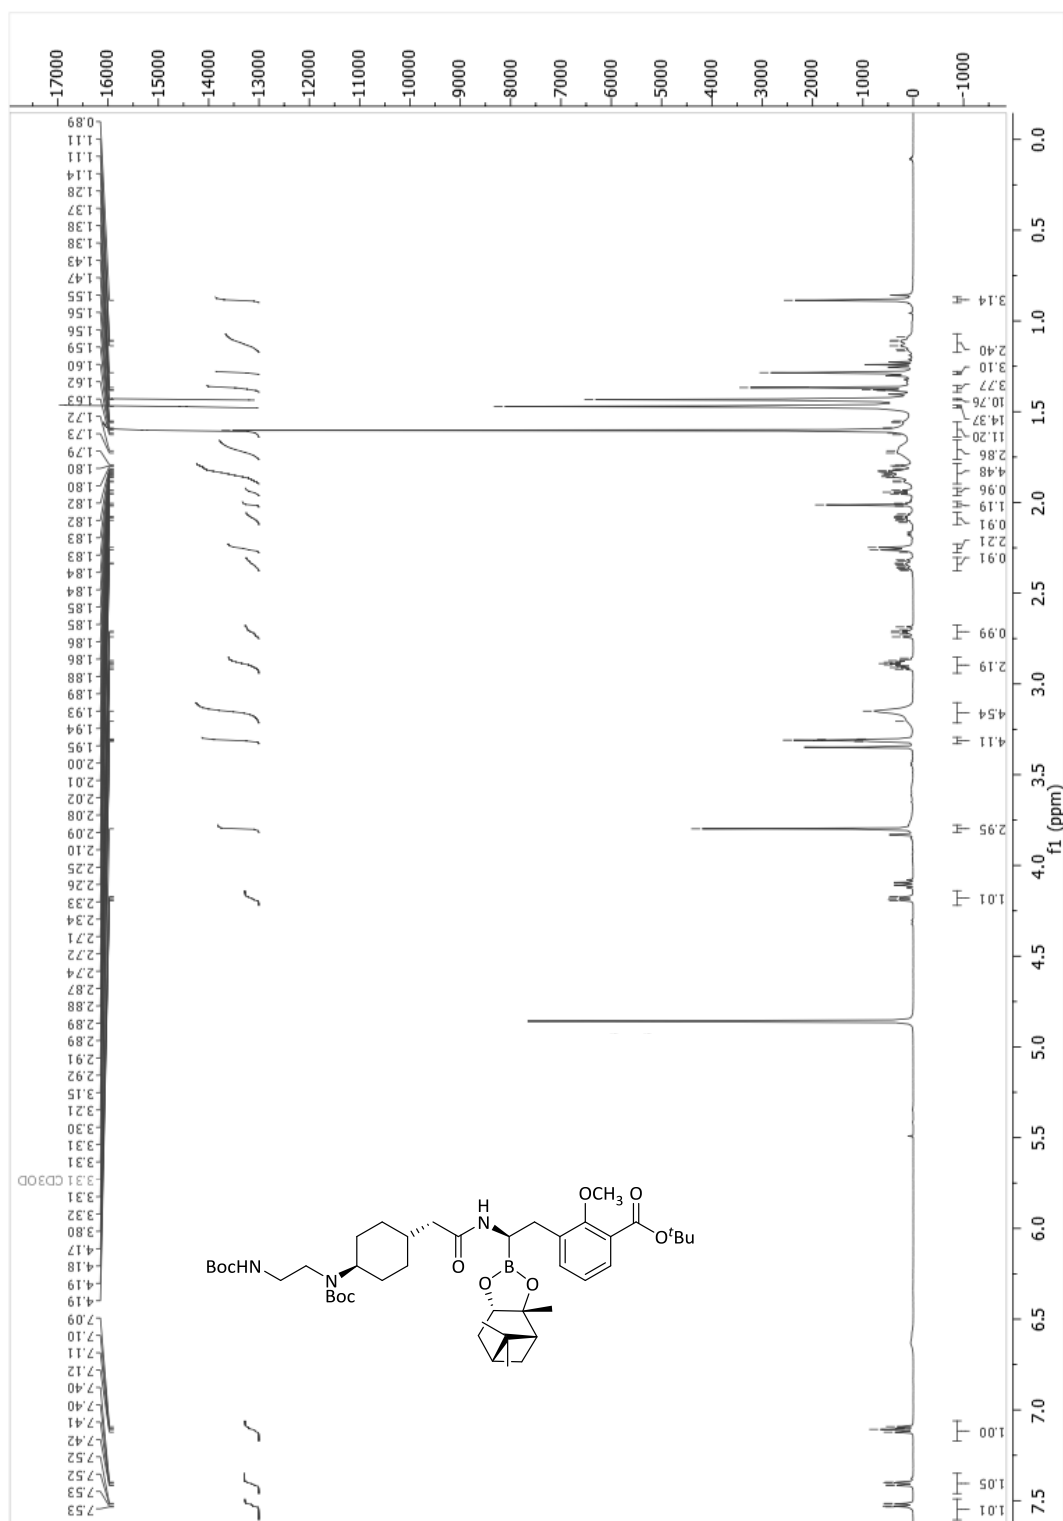

Figure 26.  $^1\text{H}$  NMR spectrum of 12.

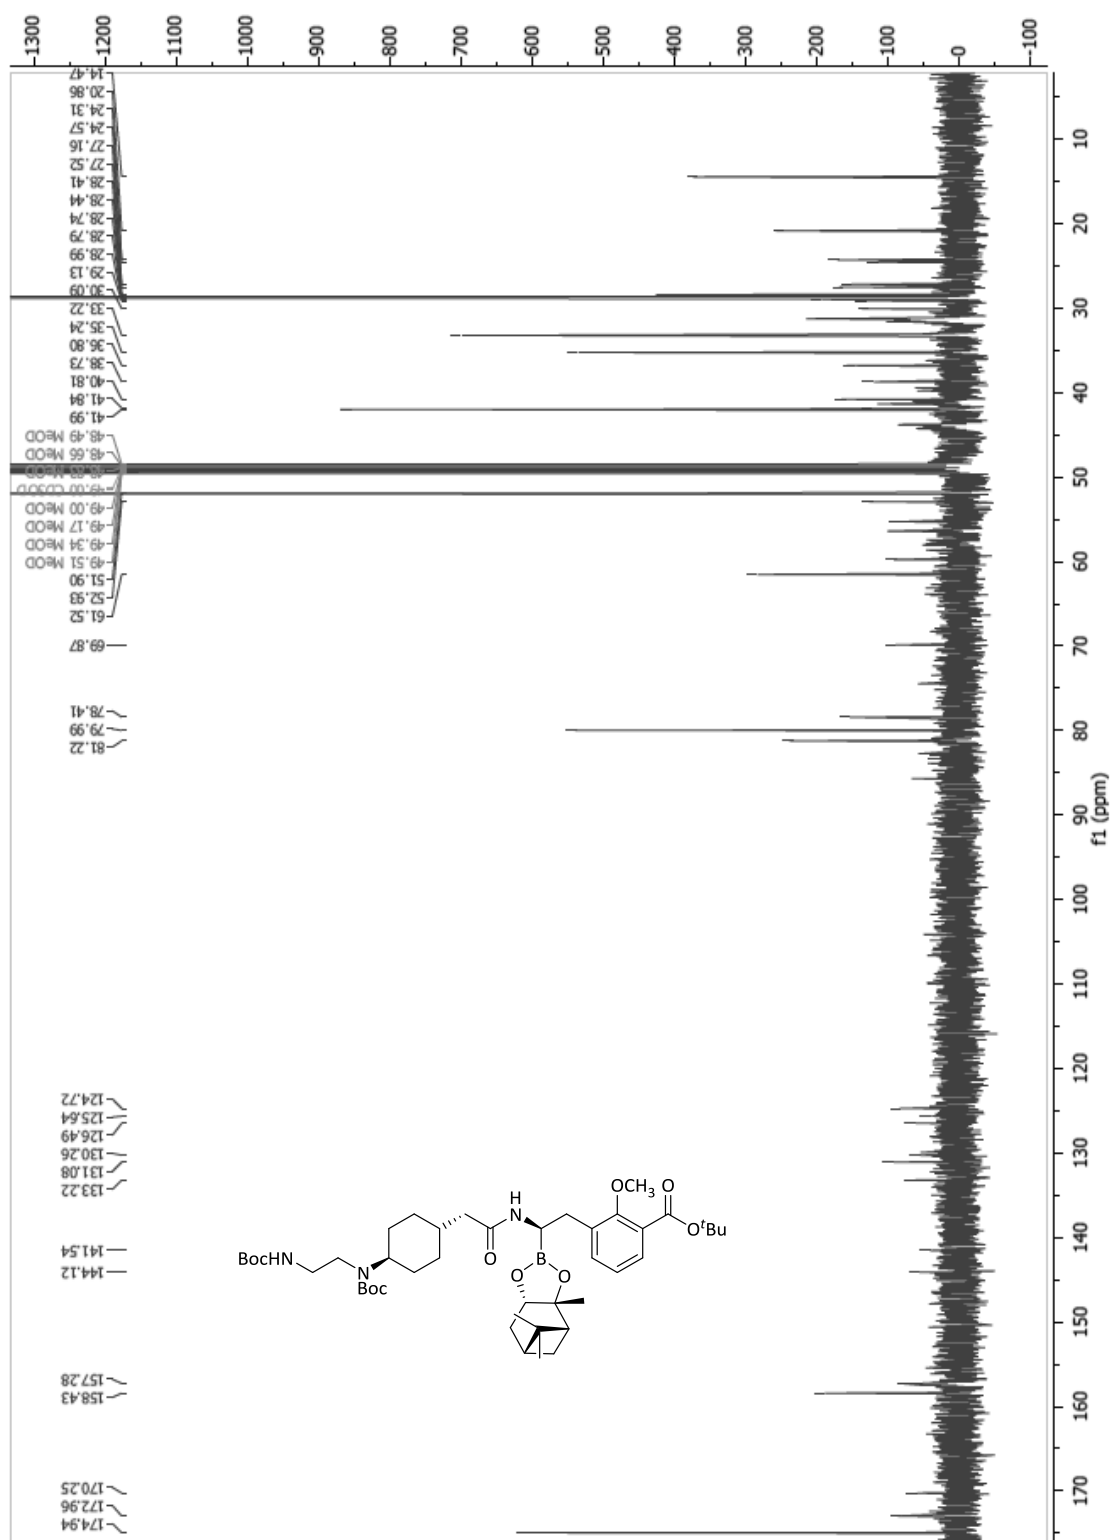

Figure S27.  $^{13}\text{C}$  NMR spectrum of 12.

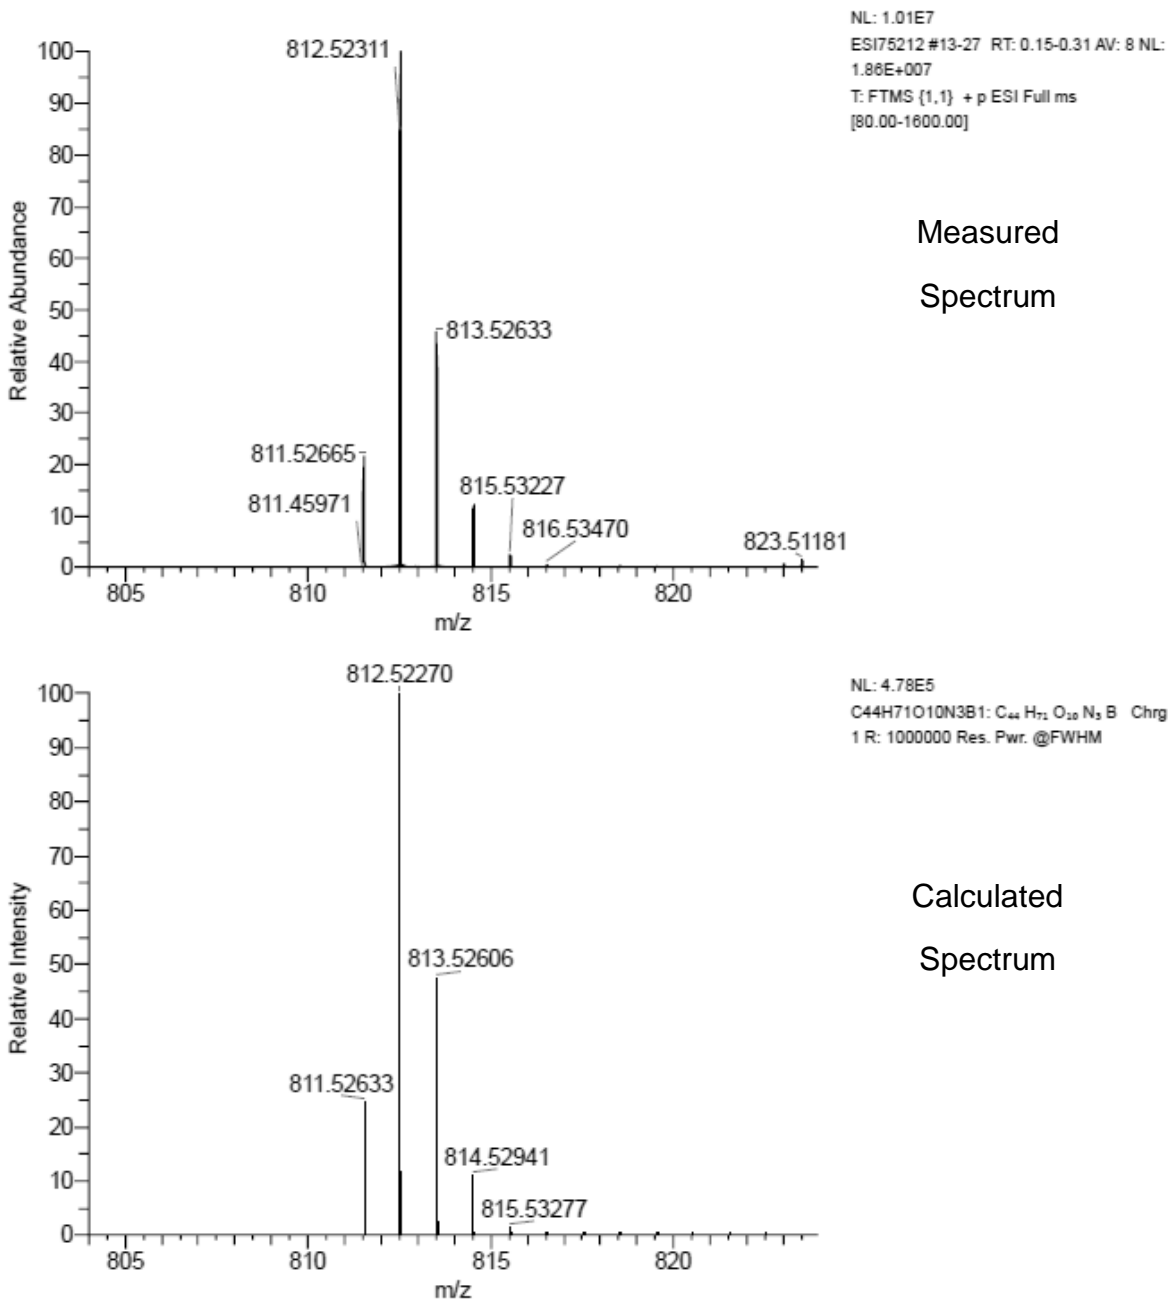

Figure S28. HRMS spectrum of 12.

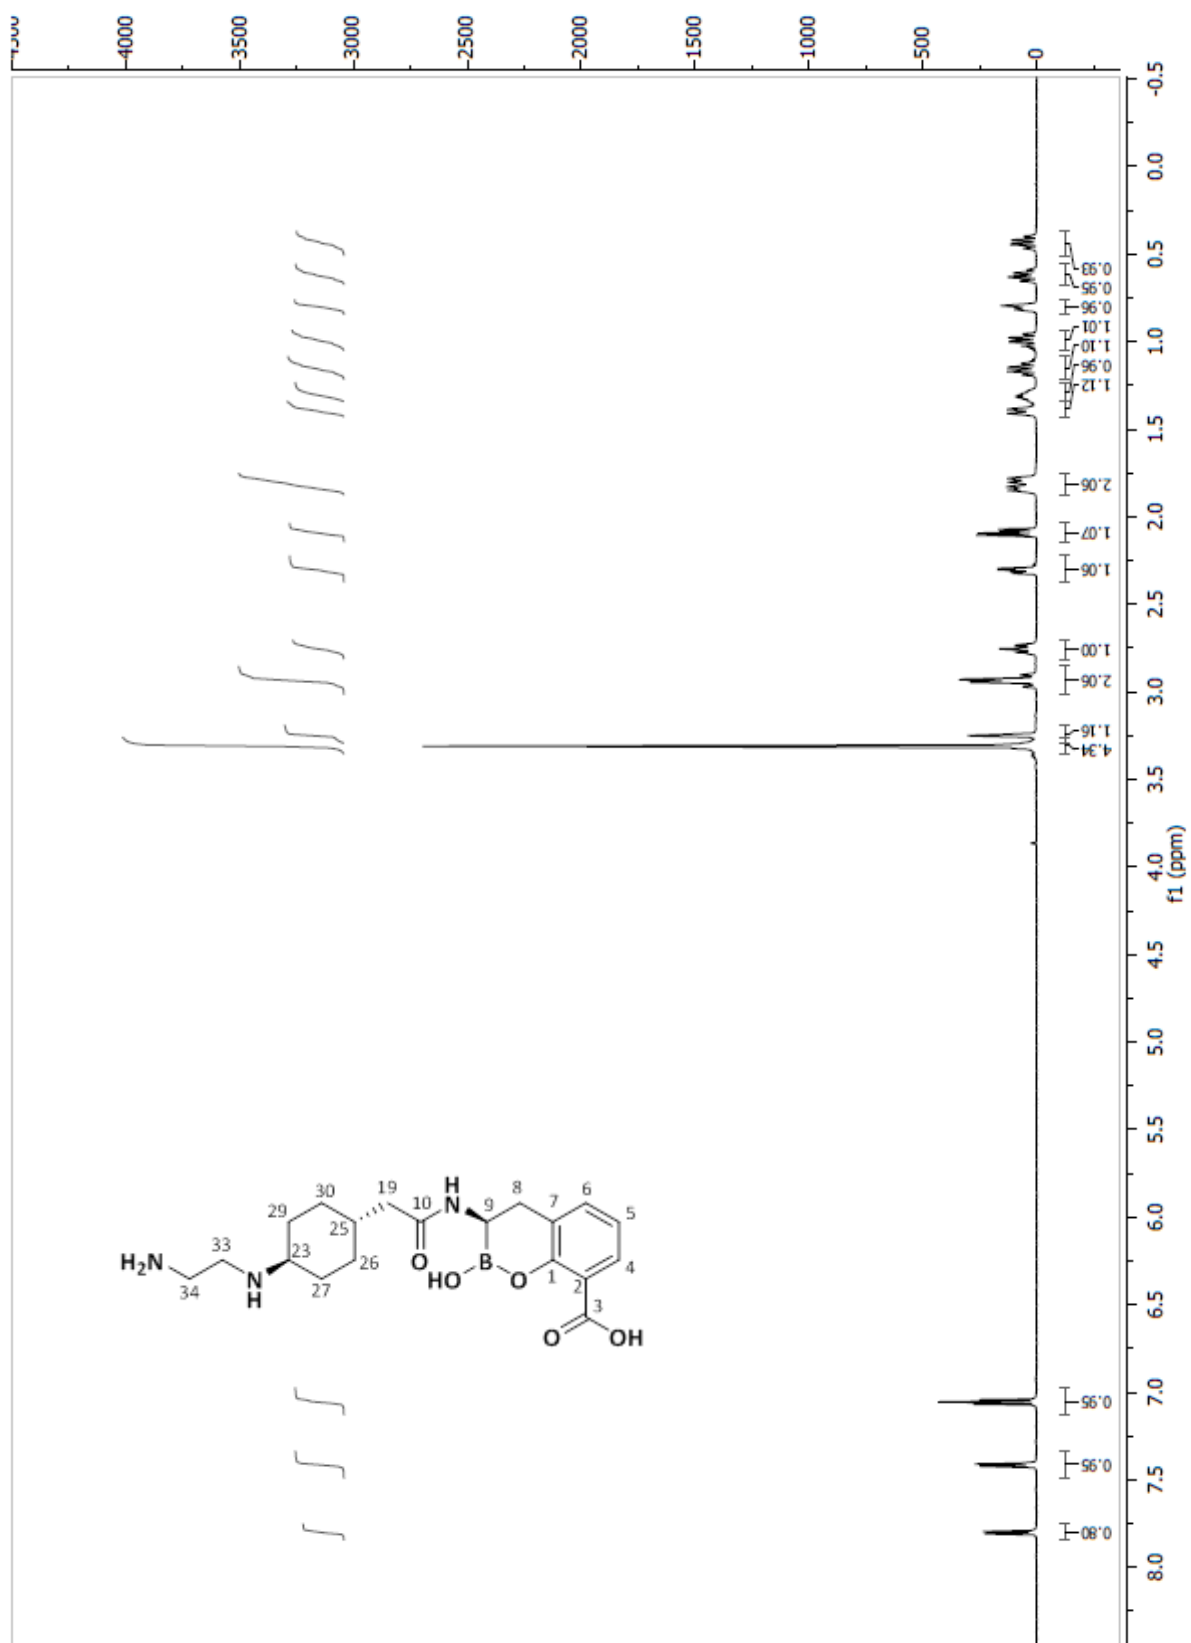

Figure S29. <sup>1</sup>H NMR spectrum of 13 (VNRX-5133)

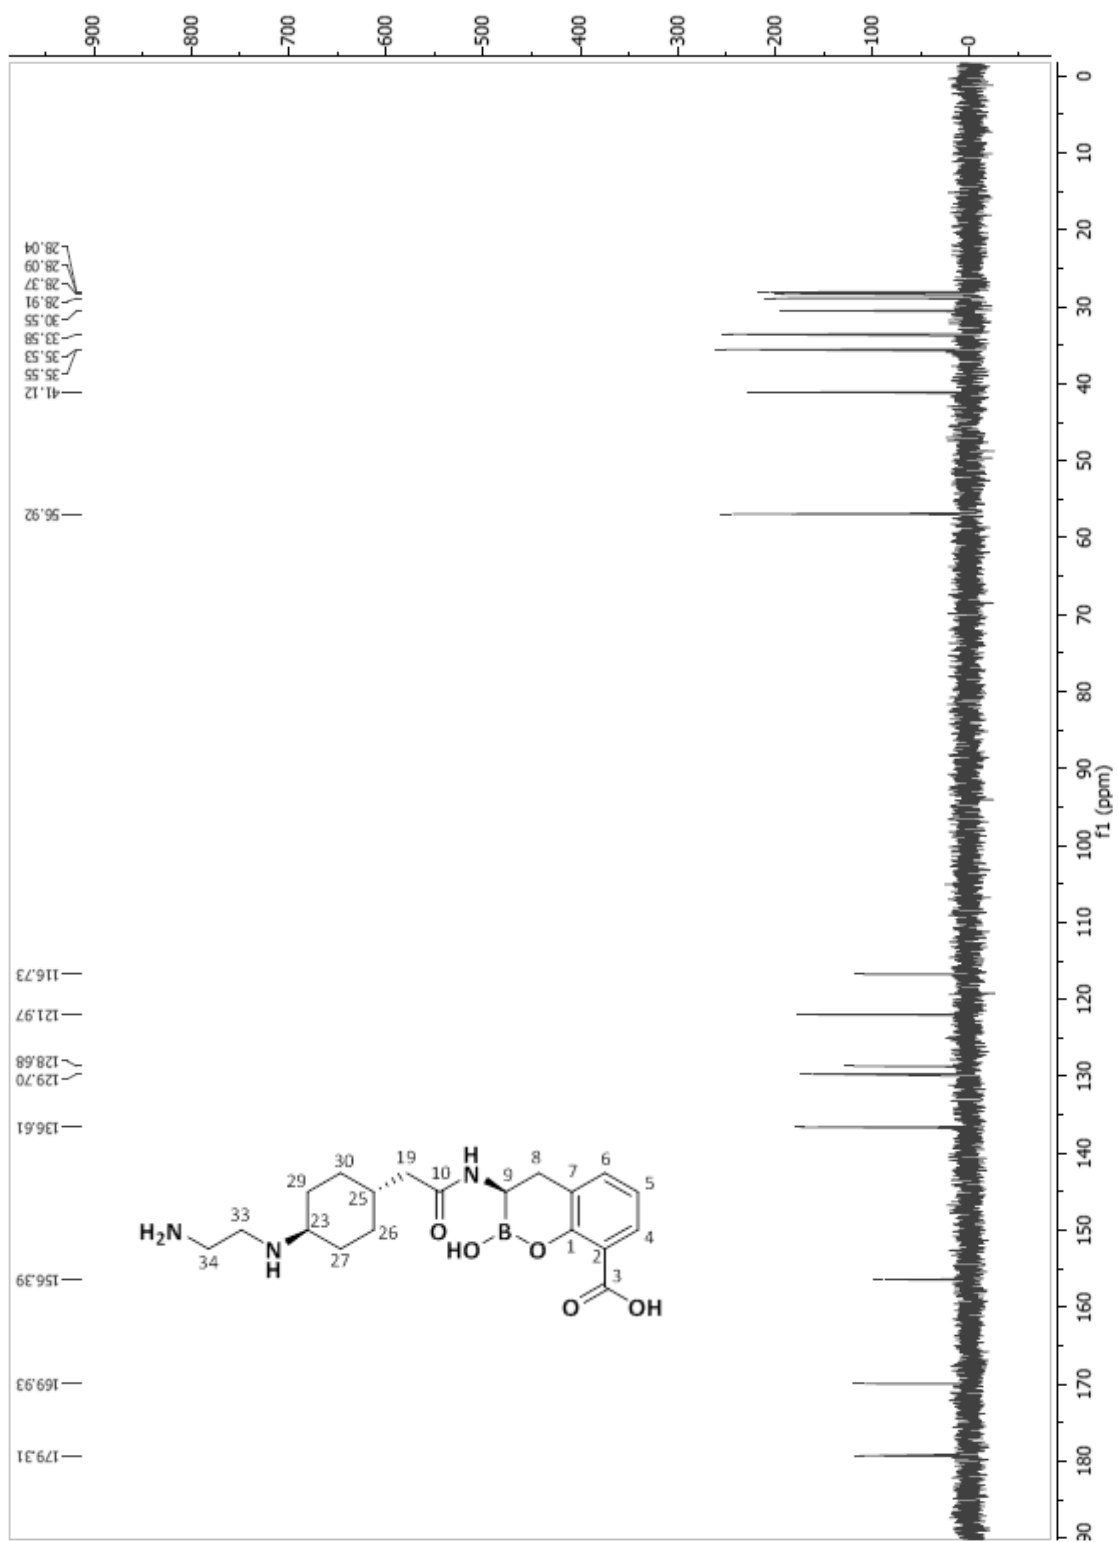

Figure S30.  $^{13}\text{C}$  NMR spectrum of 13 (VNRX-5133).



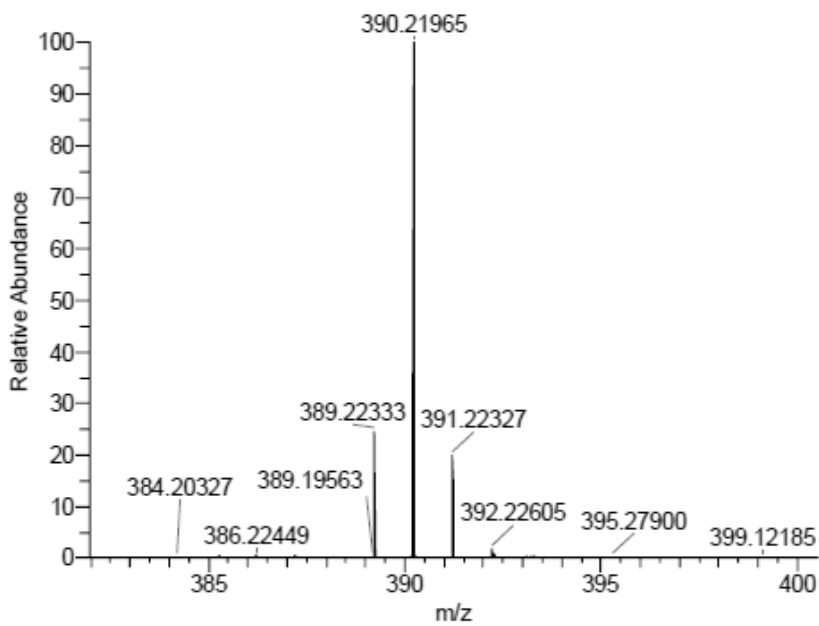

NL: 3.27E8  
 ESI75108 #13-27 RT: 0.15-0.31 AV: 8 NL:  
 1.49E+007  
 T: FTMS {1,1} + p ESI Full lock ms  
 [80.00-1600.00]

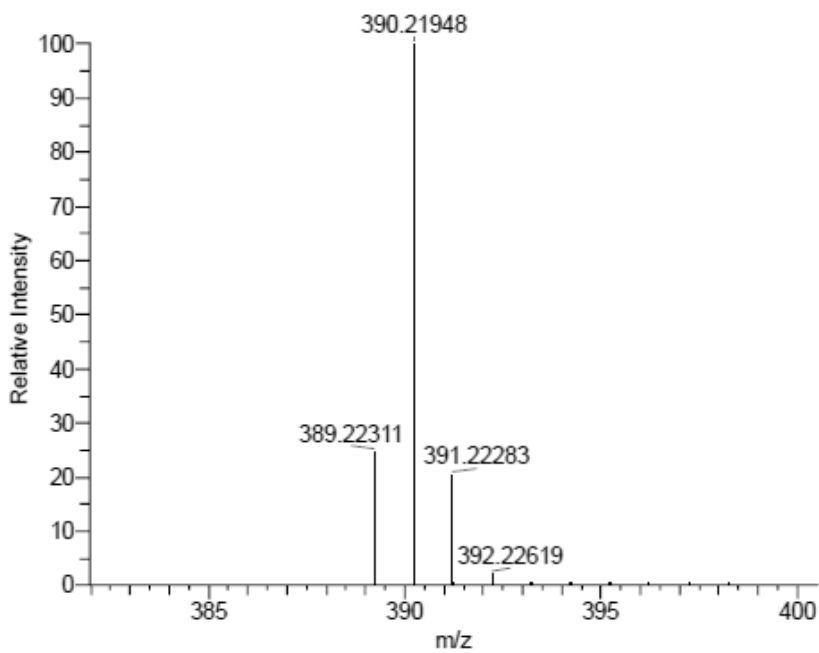

NL: 6.36E5  
 C19H29O5N3 B Chrg 1  
 R: 1000000 Res. Pwr. @FWHM

| m/z       | Formula                                                                       | RDB | Delta ppm | Theo. Mass |
|-----------|-------------------------------------------------------------------------------|-----|-----------|------------|
| 389.22333 | C <sub>19</sub> H <sub>29</sub> O <sub>5</sub> N <sub>3</sub> <sup>10</sup> B | 7   | 0.56      | 389.22311  |

Figure S31. HRMS spectrum of 13 (VNRX-5133).

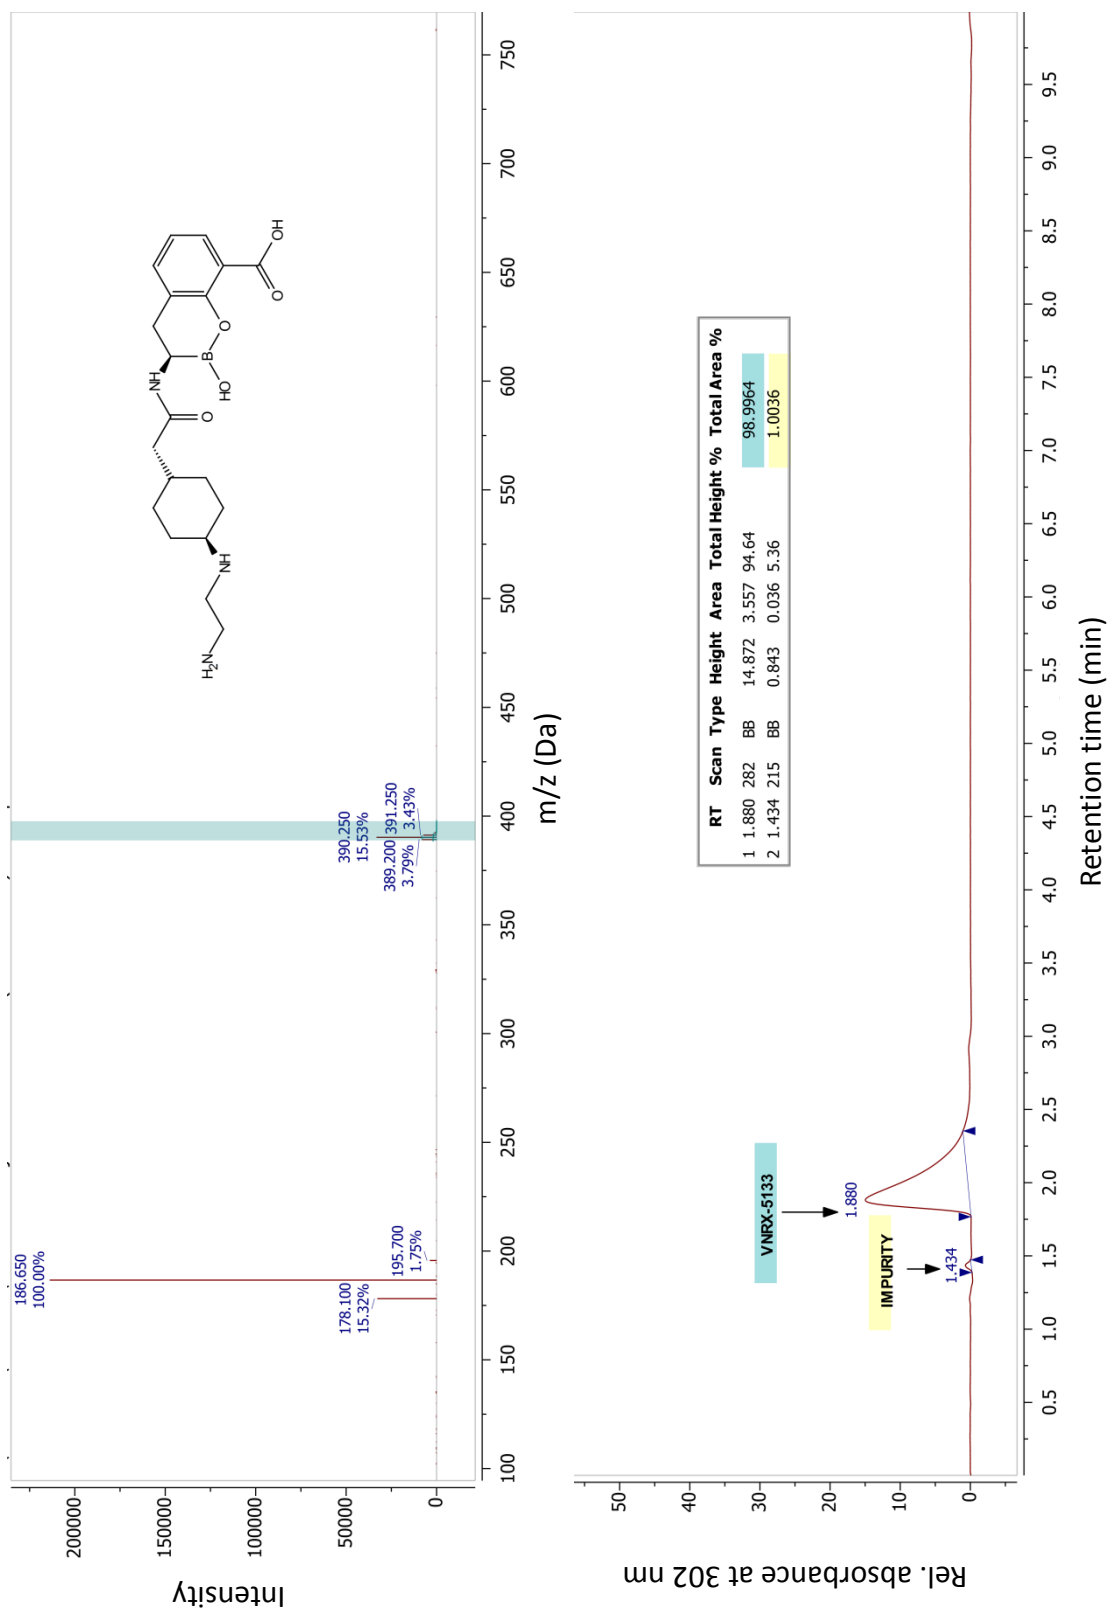

Figure S32. LC-MS spectrum of 13 (VNRX-5133).

**Table S1. Error analysis for the obtained inhibition values.**

|      | Class |                                        | 2,4-DPCA<br>pIC <sub>50</sub> <sup>a</sup> | Std.<br>Error <sup>b</sup> | Captopril<br>pIC <sub>50</sub> <sup>a</sup> | Std.<br>Error <sup>b</sup> | VNRX-5133<br>pIC <sub>50</sub> <sup>a</sup> | Std.<br>Error <sup>b</sup> |
|------|-------|----------------------------------------|--------------------------------------------|----------------------------|---------------------------------------------|----------------------------|---------------------------------------------|----------------------------|
| SBLs | A     | TEM-116                                | /                                          | /                          | /                                           | /                          | 8.9                                         | 0.00083                    |
|      | C     | AmpC<br>( <i>P. aeruginosa</i> )       | /                                          | /                          | /                                           | /                          | 7.52                                        | 0.009707                   |
|      | D     | OXA-10                                 | /                                          | /                          | /                                           | /                          | 7.63                                        | 0.0175                     |
|      | D     | OXA-10<br>(100 mM NaHCO <sub>3</sub> ) | /                                          | /                          | /                                           | /                          | 7.19                                        | 0.01122                    |
|      | D     | OXA-48                                 | /                                          | /                          | /                                           | /                          | 7.27                                        | 0.02824                    |
|      | D     | OXA-48<br>(100 mM NaHCO <sub>3</sub> ) | /                                          | /                          | /                                           | /                          | 6.62                                        | 0.02736                    |
| MBLs | B1    | VIM-1                                  | /                                          | /                          | 5.1                                         | 0.1434                     | 8.1                                         | 0.03204                    |
|      | B1    | NDM-1                                  | /                                          | /                          | 5.0                                         | 0.1164                     | 8.0                                         | 0.01621                    |
|      | B1    | VIM-2                                  | /                                          | /                          | 5.8                                         | 0.0837<br>3                | 9.3                                         | 0.01415                    |
|      | B1    | IMP-1                                  | /                                          | /                          | 5.7                                         | 0.0371<br>6                | 5.6                                         | 0.07294                    |
|      | B2    | CphA                                   | 5.1                                        | 0.06257                    | /                                           | /                          | 5.6                                         | 0.06929                    |
|      | B3    | L1                                     | /                                          | /                          | /                                           | /                          | <5.0                                        | NA <sup>c</sup>            |

<sup>a</sup> pIC<sub>50</sub> = -logIC<sub>50</sub>.

<sup>b</sup> Standard logIC<sub>50</sub> errors (Std. Error) were obtained from the GraphPadPrism 6 reports as an average of at least three technical replicates.

<sup>c</sup> NA: pIC<sub>50</sub> value out of range of concentrations tested

Figure S33. Time course evaluation of pIC<sub>50</sub> shifts of VNRX-5133 against subclass B1 MBL NDM-1.

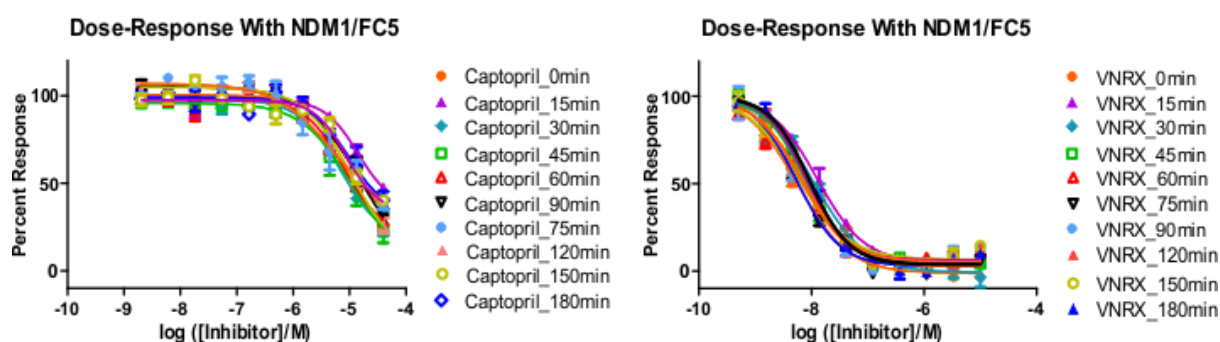

Table S2. Time-dependent inhibition of subclass B1 MBL NDM-1 by VNRX-5133.

| Time point (min) | Captopril pIC <sub>50</sub> <sup>a</sup> | Std. Error <sup>b</sup> | VNRX-5133 pIC <sub>50</sub> <sup>a</sup> | Std. Error <sup>b</sup> |
|------------------|------------------------------------------|-------------------------|------------------------------------------|-------------------------|
| 0                | 5.0                                      | 0.09623                 | 8.2                                      | 0.02657                 |
| 15               | 4.8                                      | 0.1467                  | 7.9                                      | 0.02693                 |
| 30               | 5.2                                      | 0.1224                  | 7.9                                      | 0.05004                 |
| 45               | 5.0                                      | 0.3054                  | 8.1                                      | 0.03735                 |
| 60               | 5.1                                      | 0.1339                  | 8.2                                      | 0.04964                 |
| 75               | 5.3                                      | 0.3194                  | 8.3                                      | 0.03491                 |
| 90               | 4.8                                      | 0.2977                  | 8.2                                      | 0.06285                 |
| 120              | 5.0                                      | 0.1401                  | 8.1                                      | 0.04245                 |
| 150              | 5.1                                      | 0.1213                  | 8.2                                      | 0.04525                 |
| 180              | 5.0                                      | 0.2465                  | 8.0                                      | 0.03313                 |

<sup>a</sup> pIC<sub>50</sub> = -logIC<sub>50</sub>.

<sup>b</sup> Standard logIC<sub>50</sub> errors were obtained from the GraphPadPrism 6 reports as an average of at least three technical replicates.

**Table S3. Processing and refinement statistics for NDM-1 / OXA-10 with VNRX-5133.**

| <b>Data Set</b>                                          | <b>NDM-1:VNRX-5133 complex</b>                  | <b>OXA-10:VNRX-5133 complex</b>                 |
|----------------------------------------------------------|-------------------------------------------------|-------------------------------------------------|
| <b>Beamline</b>                                          | DLS I24                                         | DLS I03                                         |
| <b>Space group</b>                                       | <i>P2<sub>1</sub>2<sub>1</sub>2<sub>1</sub></i> | <i>P2<sub>1</sub>2<sub>1</sub>2<sub>1</sub></i> |
| <b>Protein molecules per ASU<sup>†</sup></b>             | 2                                               | 2                                               |
| <b>Unit cell dimensions</b>                              |                                                 |                                                 |
| <i>a, b, c (Å)</i>                                       | 70.82, 73.84, 77.68                             | 48.87, 95.62, 126.26                            |
| <i>α, β, γ (°)</i>                                       | 90.0, 90.0, 90.0                                | 90.0, 90.0, 90.0                                |
| <b>Wavelength(s) (Å)</b>                                 | 0.96863                                         | 0.97872                                         |
| <b>Resolution (outer shell) (Å)*</b>                     | 52.34 – 1.51 (1.54 – 1.51)                      | 76.23 – 2.17 (2.21 – 2.17)                      |
| <b><i>R</i><sub>pim</sub></b>                            | 0.103 (1.304)                                   | 0.073 (0.261)                                   |
| <b>CC<sub>1/2</sub></b>                                  | 0.99 (0.421)                                    | 0.9795 (0.8852)                                 |
| <b><i>I</i> / <i>σ(I)</i></b>                            | 8.0 (2.3)                                       | 7.89 (3.13)                                     |
| <b>Completeness (outer shell) (%)</b>                    | 100.0 (100.0)                                   | 99.86 (98.96)                                   |
| <b>Redundancy</b>                                        | 11.9 (11.6)                                     | 12.50 (12.73)                                   |
| <b>Refinement</b>                                        |                                                 |                                                 |
| <b>Resolution (Å)</b>                                    | 42.70 – 1.51                                    | 63.16 – 2.17 (2.24 – 2.17)                      |
| <b>No. reflections</b>                                   | 64525                                           | 32136 (3141)                                    |
| <b><i>R</i><sub>work</sub> / <i>R</i><sub>free</sub></b> | 0.1456 / 0.1724                                 | 20.07 / 22.88                                   |
| <b>Number of non-hydrogen atoms</b>                      |                                                 |                                                 |
| Protein                                                  | 3472                                            | 3816                                            |
| Solvent                                                  | 438                                             | 304                                             |
| Zinc ions                                                | 4                                               | /                                               |
| Inhibitor                                                | 73                                              | 68                                              |
| <b>B-factors</b>                                         |                                                 |                                                 |
| Protein                                                  | 15.90                                           | 21.91                                           |
| Solvent                                                  | 30.12                                           | 28.51                                           |
| Zn ions                                                  | 10.73                                           | /                                               |
| Inhibitor                                                | 17.94                                           | 25.49                                           |
| <b>RMSD<sup>‡</sup></b>                                  |                                                 |                                                 |
| Ideal bond lengths (Å)                                   | 0.009                                           | 0.004                                           |
| Ideal bond angles (°)                                    | 0.948                                           | 1.00                                            |
| <b>Ramachandran (%)</b>                                  |                                                 |                                                 |
| Outliers                                                 | 0.00                                            | 0.00                                            |
| Favoured                                                 | 99.12                                           | 97.51                                           |

ASU<sup>†</sup> = asymmetric unit. RMSD<sup>‡</sup> = root mean square deviation.

\*Values in parentheses are for highest-resolution shell.

**Table S4. Molprobity validation report for OXA-10:VNRX-5133.**

|                          |                                                                                         |          |             |                                                        |
|--------------------------|-----------------------------------------------------------------------------------------|----------|-------------|--------------------------------------------------------|
| <b>All-Atom Contacts</b> | Clashscore, all atoms:                                                                  | 2.91     |             | 100 <sup>th</sup> percentile* (N=481, 2.17Å ± 0.25Å)   |
|                          | <i>Clashscore is the number of serious steric overlaps (&gt; 0.4 Å) per 1000 atoms.</i> |          |             |                                                        |
| <b>Protein Geometry</b>  | Poor rotamers                                                                           | 1        | 0.26%       | Goal: <0.3%                                            |
|                          | Favored rotamers                                                                        | 375      | 97.15%      | Goal: >98%                                             |
|                          | Ramachandran outliers                                                                   | 0        | 0.00%       | Goal: <0.05%                                           |
|                          | Ramachandran favoured                                                                   | 469      | 97.51%      | Goal: >98%                                             |
|                          | MolProbity score <sup>^</sup>                                                           | 1.16     |             | 100 <sup>th</sup> percentile* (N=10544, 2.17Å ± 0.25Å) |
|                          | Cβ deviations >0.25Å                                                                    | 0        | 0.00%       | Goal: 0                                                |
|                          | Bad bonds                                                                               | 2 / 3911 | 0.05%       | Goal: 0%                                               |
| Bad angles               | 0 / 5320                                                                                | 0.00%    | Goal: <0.1% |                                                        |
| <b>Peptide Omegas</b>    | Cis Prolines:                                                                           | 0 / 16   | 0.00%       | Expected: ≤1 per chain, or ≤5%                         |

In the results (3<sup>rd</sup> and 4<sup>th</sup> columns), the left column gives the raw count, the right column gives the percentage.  
 \* The 100<sup>th</sup> percentile is the best among structures of comparable resolution; the 0<sup>th</sup> percentile is the worst. For the Clashscore the comparative set of structures was selected in 2004, and for the MolProbity score in 2006.  
 ^ The MolProbity score combines the Clashscore, rotamer, and Ramachandran evaluations into a single score, normalized to be on the same scale as the X-ray structure resolution.

**Table S5. Molprobity validation report for NDM-1:VNRX-5133.**

|                          |                                                                                         |          |             |                                                        |
|--------------------------|-----------------------------------------------------------------------------------------|----------|-------------|--------------------------------------------------------|
| <b>All-Atom Contacts</b> | Clashscore, all atoms:                                                                  | 1        |             | 99 <sup>th</sup> percentile* (N=588, 1.510Å ± 0.25Å)   |
|                          | <i>Clashscore is the number of serious steric overlaps (&gt; 0.4 Å) per 1000 atoms.</i> |          |             |                                                        |
| <b>Protein Geometry</b>  | Poor rotamers                                                                           | 4        | 1.14%       | Goal: <0.3%                                            |
|                          | Favored rotamers                                                                        | 338      | 96.02%      | Goal: >98%                                             |
|                          | Ramachandran outliers                                                                   | 0        | 0.00%       | Goal: <0.05%                                           |
|                          | Ramachandran favoured                                                                   | 450      | 99.12%      | Goal: >98%                                             |
|                          | MolProbity score <sup>^</sup>                                                           | 0.84     |             | 100 <sup>th</sup> percentile* (N=4833, 1.510Å ± 0.25Å) |
|                          | Cβ deviations >0.25Å                                                                    | 0        | 0.00%       | Goal: 0                                                |
|                          | Bad bonds                                                                               | 0 / 3552 | 0.00%       | Goal: 0%                                               |
| Bad angles               | 1 / 4840                                                                                | 0.02%    | Goal: <0.1% |                                                        |
| <b>Peptide Omegas</b>    | Cis Prolines:                                                                           | 0 / 20   | 0.00%       | Expected: ≤1 per chain, or ≤5%                         |

In the results (3<sup>rd</sup> and 4<sup>th</sup> columns), the left column gives the raw count, the right column gives the percentage.  
 \* The 100<sup>th</sup> percentile is the best among structures of comparable resolution; the 0<sup>th</sup> percentile is the worst. For the Clashscore the comparative set of structures was selected in 2004, and for the MolProbity score in 2006.  
 ^ The MolProbity score combines the Clashscore, rotamer, and Ramachandran evaluations into a single score, normalized to be on the same scale as the X-ray structure resolution.

## References

1. Baurin, S.; Vercheval, L.; Bouillenne, F.; Falzone, C.; Brans, A.; Jacquamet, L.; Ferrer, J. L.; Sauvage, E.; Dehareng, D.; Frere, J. M.; Charlier, P.; Galleni, M.; Kerff, F. Critical role of tryptophan 154 for the activity and stability of class D beta-lactamases. *Biochem* **2009**, *48*, 11252-11263.
2. King, D. T.; Worrall, L. J.; Gruninger, R.; Strynadka, N. C. New Delhi metallo-beta-lactamase: structural insights into beta-lactam recognition and inhibition. *J Am Chem Soc* **2012**, *134*, 11362-11365.
3. van Berkel, S. S.; Brem, J.; Rydzik, A. M.; Salimraj, R.; Cain, R.; Verma, A.; Owens, R. J.; Fishwick, C. W.; Spencer, J.; Schofield, C. J. Assay platform for clinically relevant metallo-beta-lactamases. *J Med Chem* **2013**, *56*, 6945-6953.
4. Brem, J.; Cain, R.; Cahill, S.; McDonough, M. A.; Clifton, I. J.; Jiménez-Castellanos, J.-C.; Avison, M. B.; Spencer, J.; Fishwick, C. W. G.; Schofield, C. J. Structural basis of metallo- $\beta$ -lactamase, serine- $\beta$ -lactamase and penicillin-binding protein inhibition by cyclic boronates. *Nat Commun* **2016**, *7*, 12406.
